# **Neuromodulation-induced burst firing in parvalbumin interneurons of the basolateral amygdala mediates transition between fear-associated network and behavioral states**

Xin Fu,<sup>1,3</sup> Eric Teboul,<sup>2,3</sup> Jamie Maguire,<sup>2</sup> and Jeffrey G. Tasker<sup>1</sup>

<sup>1</sup> Neuroscience Program, Tulane Brain Institute, and Department of Cell and Molecular Biology, Tulane University, New Orleans, LA 70118

<sup>2</sup> Department of Neuroscience, Tufts University School of Medicine and Graduate School of Biomedical Sciences, Boston, MA 02111

<sup>3</sup> These authors contributed equally

Abstract: 234 words

Introduction: 649 words

Results: 3627 words

Discussion: 1256 words

## Abstract

Network orchestration of behavioral states involves coordinated oscillations within and between brain regions. The network communication between the basolateral amygdala (BLA) and the medial prefrontal cortex (PFC) plays a critical role in fear expression. Neuromodulatory systems play an essential role in regulating changes between behavioral states, however, a mechanistic understanding of how amygdalar circuits mediate transitions between brain and behavioral states remains largely unknown. Here, we examine the role of Gq-mediated neuromodulation of parvalbumin (PV)-expressing interneurons in the BLA in coordinating network and behavioral states using combined chemogenetics, patch clamp and field potential recordings. We demonstrate that Gq-signaling via hM3D designer receptor and  $\alpha 1$  adrenoreceptor activation shifts the pattern of activity of the PV interneurons from tonic to phasic by stimulating a previously unknown, highly stereotyped bursting pattern of activity. This, in turn, generates bursts of inhibitory postsynaptic currents (IPSCs) and phasic firing in BLA principal neurons. The Gq-induced transition from tonic to phasic firing in BLA PV interneurons suppressed amygdalo-frontal gamma oscillations *in vivo*, consistent with the critical role of tonic PV neuron activity in gamma generation. The suppression of gamma oscillations by hM3D and  $\alpha 1$  receptor activation in BLA PV interneurons also facilitated fear memory recall, in line with the inhibitory effect of gamma on fear expression. Thus, our data reveal a BLA parvalbumin neuron-specific neuromodulatory mechanism that mediates the transition to a fear-associated brain network state via regulation of amygdalo-frontal gamma oscillations.

## Introduction

Switching between different brain and behavioral states is necessary to adapt to an ever-changing environment. Accompanying brain-state switches are prominent changes in population-level rhythmic and synchronous neural activity (Buzsáki et al., 2012; Lee & Dan, 2012), which can be detected by changes in oscillations of local field potentials and is shaped by the activity of inhibitory interneurons (Bocchio et al., 2017; Buzsáki et al., 2012). Subcortical neuromodulatory systems influencing various cognitive processes, such as arousal, are key mediators of brain state transitions (Lee & Dan, 2012; McCormick et al., 2020), and significantly modulate network rhythmic and synchronous patterning. Increasing evidence indicates that inhibitory interneurons are major targets for neuromodulation and are activated by multiple neuromodulators, such as norepinephrine, serotonin, and acetylcholine, via their cognate G protein-coupled receptors (GPCRs) coupled to Gq signaling pathways (Wester & McBain, 2014; Zagha & McCormick, 2014). Thus, Gq-mediated neuromodulatory regulation of inhibitory interneurons may be critical for orchestrating the changes in neural oscillations that lead to switches in the operational state of the brain.

The basolateral amygdala (BLA) acts as a critical node among limbic networks for processing emotionally salient information and promoting emotional brain states. Increasingly, patterned BLA network activity has proven central to this process (Courtin et al., 2014; Davis et al., 2017; Kanta et al., 2019; Karalis et al., 2016; Likhtik et al., 2014; Ozawa et al., 2020; Stujenske et al., 2014). Particular emphasis is given to gamma-frequency ( $\sim 30 - 120$  Hz) BLA oscillatory activity in the dynamic regulation of conditioned fear expression (Courtin et al., 2014; Stujenske et al., 2014). Mechanisms of gamma rhythm generation in other limbic regions point to a coordinating role for parvalbumin-expressing (PV) interneurons (Bartos et al., 2007; Buzsáki et al., 2012; Cardin et al., 2009; Hájos et al., 2004; Sohal et al., 2009), and PV interneurons have been

shown to play a critical role in the behavioral expression of fear (Davis et al., 2017; Ozawa et al., 2020). Recent evidence demonstrates a critical role for PV interneurons in generating local gamma oscillations in the BLA (Antonoudiou et al., 2021), likely due to their fast-spiking properties and dense perisomatic innervation of hundreds of neighboring principal cells for fast temporal control over synchronous activity (Vereczki et al., 2016; Veres et al., 2017). Parvalbumin-expressing interneurons in cortical areas are also sensitive to neuromodulatory signals (e.g., noradrenergic inputs) that tune PV cell activity via GPCR activation to execute brain state-dependent behavioral tasks (Garcia-Junco-Clemente et al., 2019; Polack et al., 2013). This provides a potential signaling mechanism for modulatory control of BLA PV cells in brain state transitions and behavior. Indeed, neuromodulatory signaling in the BLA via norepinephrine plays a well-documented role in promoting conditioned fear states (Giustino & Maren, 2018). Despite this critical role for BLA noradrenergic signaling in conditioned fear expression, how the neuromodulatory regulation of BLA PV interneurons influences cellular activity patterns and local network rhythms in fear states is not known.

Here, we tested the role of Gq neuromodulation of PV cells in guiding network states and regulating conditioned fear expression. Our findings reveal a novel cellular and molecular mechanism for emotional brain state transitions whereby Gq signaling reconfigures the BLA PV interneuron activity pattern, in turn tuning BLA network oscillations and facilitating conditioned fear expression. Stimulation of Gq signaling through either Gq-coupled designer receptor, hM3D, or  $\alpha 1A$  adrenoreceptor activation transformed the firing mode of BLA PV interneurons from tonic firing to phasic bursting and generated synchronized repetitive bursts of IPSCs in BLA principal neurons. hM3D and  $\alpha 1A$  adrenoreceptor activation in the BLA suppressed gamma oscillations recorded *in vivo*. Selective rescue of  $\alpha 1A$  adrenergic signaling or activation of hM3D receptors in BLA PV interneurons in global  $\alpha 1A$  adrenoreceptor knockouts enhanced conditioned fear

expression. Our data demonstrate, therefore, a novel cellular mechanism for the modulation by emotionally salient signals of neural circuit oscillations and fear memory expression by burst generation in fast-spiking PV cells of the BLA.

## Results

### Gq activation in BLA PV interneurons stimulates repetitive bursts of IPSCs

To investigate the function of Gq activation in PV interneurons in modulating BLA neural activity, a Cre-dependent AAV virus (AAVdj-DIO-hDLX-hM3D(Gq)-mCherry) was injected bilaterally into the BLA of PV-Cre mice to express Gq-coupled designer receptors exclusively activated by designer drugs (DREADDs) specifically in PV interneurons (Fig. 1A-C). Two weeks after viral delivery of the Gq-DREADDs to BLA PV interneurons, whole-cell voltage clamp recordings were performed in putative BLA principal cells in amygdala slices in the presence of glutamate AMPA-receptor (DNQX, 20  $\mu$ M) and NMDA-receptor antagonists (APV, 40  $\mu$ M) to isolate inhibitory postsynaptic currents (IPSCs). Notably, Gq-DREADD activation selectively in PV interneurons with clozapine N-oxide (CNO) (5  $\mu$ M) induced stereotyped phasic bursts of IPSCs. The repetitive IPSC bursts showed an accelerating intra-burst frequency, which peaked at higher than 50 Hz and generated a shift in the baseline holding current due to summation (Fig. 1D, E). We observed multiple subtypes of phasic bursts that had varying amplitudes, durations, and acceleration rates (Fig. 1D), suggesting that the different repetitive bursts were generated by different presynaptic PV interneurons. The PV-mediated repetitive IPSC bursts were of relatively long duration ( $3.63 \pm 0.26$  s) and recurred at a low frequency (burst frequency:  $0.032 \pm 0.001$  Hz; inter-burst interval range: 20 to 80 s) (Fig. 1F), and continued for >20 min after CNO was washed from the recording chamber. Consistent with synaptic output from PV interneurons being mediated exclusively by P/Q-type calcium channels, and not N-type calcium channels (Chu et al., 2012; Freund & Katona,

2007; Wilson et al., 2001), we found that the CNO-induced IPSC bursts were totally abolished by the selective P/Q-type calcium channel blocker  $\omega$ -agatoxin (0.5  $\mu$ M), but not by the N-type calcium channel blocker  $\omega$ -conotoxin (1  $\mu$ M) (Fig. 1H, supplementary Fig. 1A-D).

**Figure 1.**

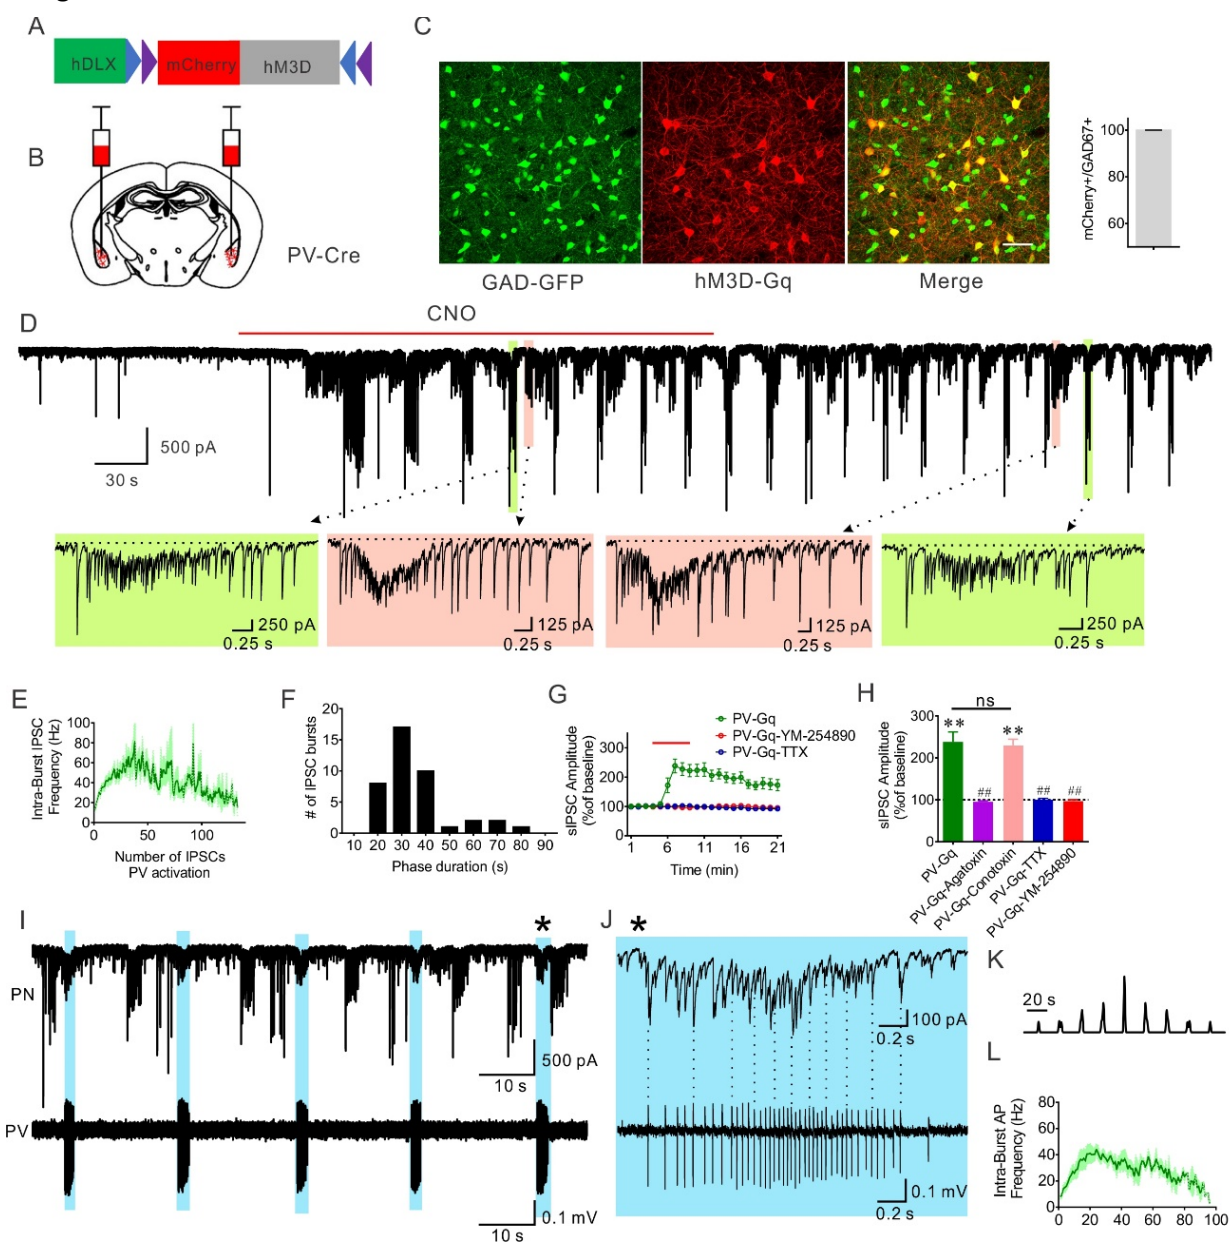

Figure 1. Gq activation in PV interneurons stimulates patterned IPSC bursts in BLA principal neurons. (A, B) Schematic diagrams of bilateral injection of conditional AAV virus expressing Gq coupled DREADDs (hM3D) in the BLA of PV-Cre animals. (C) Expression of Gq-DREADD in PV interneurons, which exclusively colocalize with Gad67 positive interneurons (10 sections from 4 animals, 278 cells, ratio=99.81%). (D) A representative recording showing the generation of phasic IPSC bursts in a BLA principal neuron by selective chemogenetic activation of PV interneurons with bath application of CNO. Dashed arrows designate expanded traces of individual bursts to illustrate different stereotyped IPSC bursts (color-coded) at two successive time points. The dashed lines show the depressed baseline of holding current due to the summation of high-frequency IPSCs in the burst. (E) Mean ( $\pm$  SEM) of instantaneous intra-burst IPSC frequency over the course of accelerating IPSC bursts. (F) A histogram showing the distribution of the phase duration of repetitive IPSC bursts (41 bursts from 12 cells). (G, H) Time course and mean change in sIPSC amplitude with Gq activation in PV interneurons. The CNO-induced increase in sIPSC amplitude was completely blocked by the P/Q-type calcium channel antagonist  $\omega$ -agatoxin, the sodium channel blocker TTX, and the selective  $G\alpha_{q/11}$  inhibitor YM-254890, but not by the N-type calcium channel antagonist  $\omega$ -agatoxin (PV-Gq, 12 cells from 5 mice; PV-Gq-Agatoxin, 7 cells from 3 mice; PV-Gq-Conotoxin, 7 cells from 3 mice; PV-Gq-TTX, 8 cells from 4 mice; PV-Gq-YM-254890, 9 cells from 4 mice; Paired  $t$  test: PV-Gq vs. baseline,  $p = 0.0001$ ; PV-Gq-Conotoxin vs. baseline,  $p = 0.0001$ , \*\*,  $p < 0.01$ ; One-Way ANOVA,  $F(4,38) = 22.72$ ,  $p < 0.0001$ , Dunnett's multiple comparisons test, PV-Gq vs. PV-Gq-Agatoxin,  $p < 0.0001$ , PV-Gq vs. PV-Gq-Conotoxin,  $p = 0.98$ , PV-Gq vs. PV-Gq-TTX,  $p < 0.0001$ , PV-Gq vs. PV-Gq-YM-254890,  $p < 0.0001$ , ##,  $p < 0.01$ , ns, not significant). (I, J) Representative paired recordings showing repetitive IPSC bursts recorded in a BLA principal neuron with whole-cell recording and associated action potential bursts recorded in a PV interneuron with loose-seal recording. Correlated activities are labeled with blue shades and the burst marked with an asterisk was expanded to show the time-locked IPSCs and action potentials. Selected synchronous spikes and IPSCs are designated by the dotted lines. (K) Autocorrelation diagram showing the  $\sim 20$ -s rhythmicity of action potential bursts in the PV neuron shown in I. (L) Mean instantaneous intra-burst frequency ( $\pm$  SEM) of action potentials in PV interneurons.

To confirm that the Gq-DREADD-induced IPSC bursts were mediated by the excitation of PV interneurons through Gq signaling, we blocked Gq protein activation with a selective  $G\alpha_{q/11}$  inhibitor YM-254890 (10  $\mu$ M), which blocks the switch of  $G\alpha_q$  from the GDP- to GTP-bound state (Takasaki et al., 2004). We found that CNO-induced IPSC bursts were completely eliminated with the Gq blocker (Fig. 1G, H). In addition, blocking spiking activity with tetrodotoxin (TTX, 0.5  $\mu$ M) also abolished the PV-mediated IPSC bursts (Fig. 1G, H), demonstrating the dependence of Gq-induced IPSC bursting in BLA principal neurons on Gq activation in presynaptic PV interneuron somata/dendrites. Because bath application of CNO, which creates a stable drug concentration over minutes and presumably generates a continuous depolarization of PV interneurons, induced

a phasic synaptic output, we next tested whether sustained PV neuron excitation independent of Gq activation is also sufficient to generate the repetitive IPSC bursting pattern in principal cells using photoactivation of PV neurons with channelrhodopsin (ChR2). Two weeks after delivery of AAV9-EF1a-DIO-ChR2-mCherry to the BLA of PV-cre mice, continuous photostimulation of PV interneurons with blue light in brain slices failed to generate phasic IPSC bursts in the principal cells, but induced a tonic increase in IPSCs that was phase-locked to the light stimulation (Supplementary Fig. 1E, F). These results together suggest Gq signaling is required for PV interneuron generation of the phasic pattern of inhibitory synaptic output.

The repetitive bursting pattern of IPSCs in BLA principal neurons suggests that presynaptic PV interneurons fire phasic action potential bursts with Gq activation. To directly test this, extracellular loose-seal patch clamp recordings of PV interneurons were performed in slices from PV-Cre mice expressing cre-dependent Gq-DREADDs in the BLA. Similar to the pattern of IPSC bursts in principal neurons, PV cells responded to CNO (5  $\mu$ M) by firing repetitive accelerating bursts of action potentials that recurred at a low frequency ( $0.034 \pm 0.005$  Hz,  $n = 9$  cells) in the presence of DNQX and APV (Fig. 1I-L). Further blockade of fast GABAergic inhibitory synaptic transmission with picrotoxin (50  $\mu$ M) did not affect the pattern of action potential bursts stimulated by CNO in PV interneurons ( $n=3$ , data not shown), suggesting that the bursting activity in PV cells is mediated by an intrinsic rather than circuit mechanism. In paired recordings of synaptically connected PV and principal neurons ( $n=5$  pairs), we found that the action potential bursts in PV neurons were time-locked to one of the subtypes of IPSC bursts in the principal neurons (Fig.1I), confirming that the different subtypes of Gq-induced IPSC bursts in principal neurons were generated by different presynaptic PV interneurons. Moreover, we observed that the action potentials within the bursts of PV cells were time-locked with individual IPSCs in the corresponding IPSC bursts of the principal cells (Fig. 1J). Therefore, Gq activation drives a



repetitive bursting pattern of action potentials in BLA PV interneurons to induce patterned bursts of phasic inhibitory synaptic inputs to BLA principal neurons.

**Figure 2.**

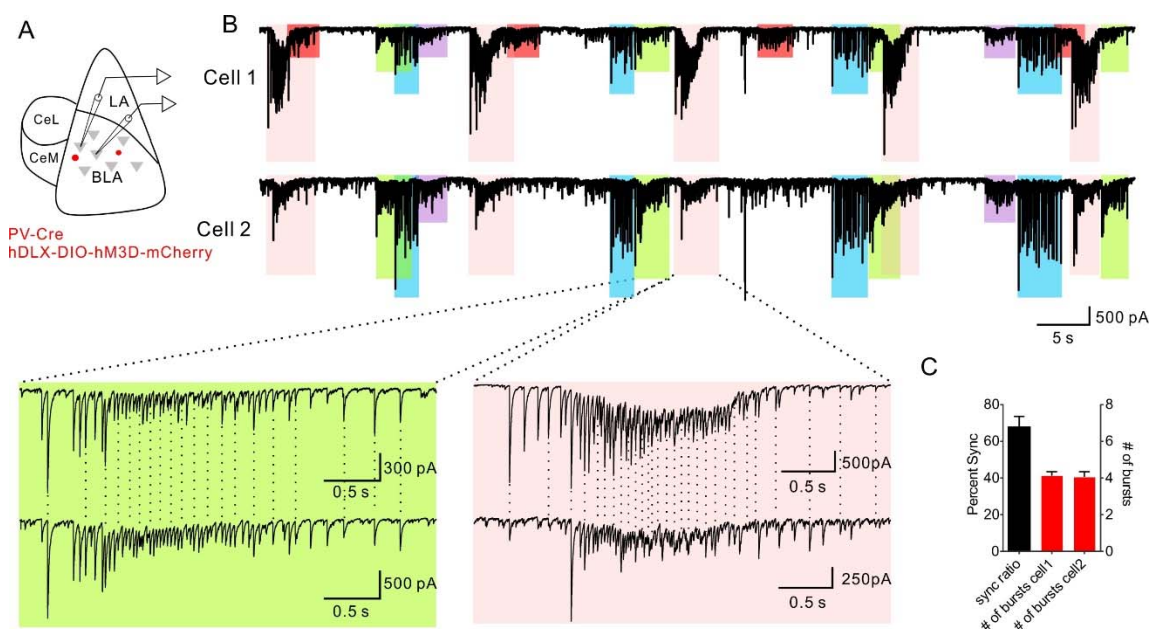

Figure 2. Synchronized Gq-activated IPSC bursts in BLA principal neurons. (A) Schematic showing paradigm of paired recordings of adjacent BLA principal neurons in Gq-DREADD-injected PV-Cre mice. (B) Representative recordings showing synchronized bursts of IPSCs in a pair of BLA principal neurons, Cell 1 and Cell 2. Different colored boxes represent different IPSC bursts repeated over the course of the recording; the same-colored boxes in the two recordings indicate bursts that were synchronized between the two cells. The red-colored bursts in Cell 1 were not associated with a synchronous IPSC burst in Cell 2. Bottom: Expanded traces of two different, color-coded IPSC bursts from each cell. The dashed vertical lines show the high synchronicity between the two cells of the individual IPSCs that make up each of the bursts. (C) The mean ratio of synchronized bursts to total bursts, and the total number of different subtypes of bursts induced in pairs of principal cells by Gq activation of PV interneurons (16 pairs from 6 mice).

Perisomatic PV interneurons innervate hundreds of principal neurons to effectively control spike timing and population-level neural activity (Freund & Katona, 2007; Vereczki et al., 2016; Veres et al., 2017), raising the question whether PV-mediated phasic IPSC bursts are synchronized between BLA principal neurons. To test this, we first examined the degree of

synchrony among Gq-induced IPSC bursts with paired recordings from adjacent BLA principal neurons (inter-soma distance  $\leq 40 \mu\text{m}$ ) following CNO activation of hM3D in PV interneurons (Fig. 2A). Interestingly, CNO application induced similar responses in both cells in most of the paired recordings (Fig. 2B). Moreover, we found that the CNO-induced recurrent IPSC bursts were synchronized between each pair at two different levels: 1) the bursts that were synchronized between two cells were synchronous at each repetition, and 2) the individual IPSCs within synchronized bursts were synchronized (Fig. 2B). This is consistent with each specific subtype of IPSC burst being generated by repetitive action potential bursts in a distinct presynaptic PV interneuron. Dividing the total number of PV-mediated IPSC bursts by the number of synchronized bursts, we calculated one BLA principal neuron receives on average 4.1 different IPSC bursts from presumably different presynaptic PV interneurons, and 67.7% of all the bursts are synchronized between the pairs of recorded cells (16 recorded pairs from 5 mice) (Fig. 2C).

### **Norepinephrine stimulates PV neuron-mediated repetitive IPSC bursts**

Having established the role for Gq signaling in driving repetitive phasic synaptic outputs from PV interneurons in the BLA, we next tested whether native Gq-coupled GPCRs on PV interneurons generate similar bursts of IPSCs in BLA principal neurons. Norepinephrine (NE) is an arousal neuromodulator that is released in the amygdala during stress (McIntyre et al., 2002), and Gq-coupled  $\alpha 1$  adrenoreceptors are highly expressed in the BLA (Day et al., 1997). We performed voltage clamp recordings of IPSCs in the presence of glutamate AMPA and NMDA receptor antagonists in BLA principal neurons in amygdala slices. NE application (20 – 100  $\mu\text{M}$ ) induced a robust, concentration-dependent increase in spontaneous IPSCs that was characterized by a repetitive bursting pattern, which was similar to that elicited by Gq-DREADD activation in PV neurons (Fig. 3A). Following an initial increase in IPSC frequency that inactivated within 35 s to

135 s (mean = 71 s) and was not seen with Gq-DREADD activation, a rhythmic bursting pattern of IPSCs emerged at higher NE concentrations (Fig. 3A-D; supplementary Figure 2A, B). The repetitive IPSC bursts occurred at a very low frequency ( $0.028 \pm 0.002$  Hz), displayed a fast acceleration of intra-burst IPSC frequency that reached peak frequencies > 50 Hz (peak frequency = 50 to 133 Hz), lasted for several seconds (duration, 1.58 to 10.55s, mean =  $4.88 \pm 0.37$ s), and gradually tapered off (Fig. 3B-E); these NE-induced IPSC bursts were very similar to the repetitive IPSC bursts stimulated in the principal neurons by Gq activation in PV interneurons (see Fig. 1). In some recordings, we observed multiple subtypes of NE-induced IPSC bursts with differing burst characteristics (Supplementary Fig. 3A), which we interpreted to be generated by multiple presynaptic PV neurons, like the Gq-DREADD-induced IPSC bursts. Individual IPSCs within the NE-induced bursts showed a fast rise time (10-90%:  $1.11 \text{ ms} \pm 0.07 \text{ ms}$ ) and decay time (tau:  $18.94 \text{ ms} \pm 1.04 \text{ ms}$ ), suggesting that they originated from perisomatic inhibitory interneurons, such as cholecystokinin (CCK) or PV basket cells (McGarry & Carter, 2016; Wilson et al., 2001). CCK and PV basket cells can be distinguished by differential expression of voltage-gated calcium channels and CB1 receptors at their synapses (Freund & Katona, 2007; Owen et al., 2013). Double dissociation of NE-induced IPSCs with calcium channel blockers and a cannabinoid receptor agonist showed that while the initial increase in IPSC amplitude was blocked by the N-type calcium channel blocker  $\omega$ -conotoxin ( $1 \mu\text{M}$ ) and a CB1 receptor agonist, WIN 55,212-2 ( $1 \mu\text{M}$ ), the repetitive IPSC bursts were not affected by either  $\omega$ -conotoxin or WIN 55,212-2, but were selectively blocked by the P/Q-type calcium channel blocker  $\omega$ -agatoxin ( $0.5 \mu\text{M}$ ) (Fig. 3A, F, G). Since GABA release from PV interneurons is P/Q-type channel dependent, while GABA release from CCK interneurons is mediated by N-type channels (Freund & Katona, 2007; Wilson et al., 2001), this indicated that the NE-induced phasic IPSC bursts were generated by GABA release from PV interneuron synapses onto the principal cells. While it abolished the NE-induced IPSC bursts,

blocking PV interneuron inputs to principal cells with the P/Q channel antagonist only suppressed the overall increase in IPSC frequency by about 50%, and blocking CCK basket cell inputs with the CB1 receptor agonist failed to reduce the frequency response further (Supplementary Fig. 3B), which suggested that NE also activates other interneuron inputs to the principal cells, possibly from somatostatin cells. The further decrease in the NE-induced increase in IPSC frequency by TTX (Supplementary Fig. 3H-J) suggests that this residual IPSC response to NE is mediated by a combination of NE actions at the somata (TTX-sensitive) and axon terminals (TTX-insensitive) of these unidentified presynaptic interneurons.

**Figure 3.**

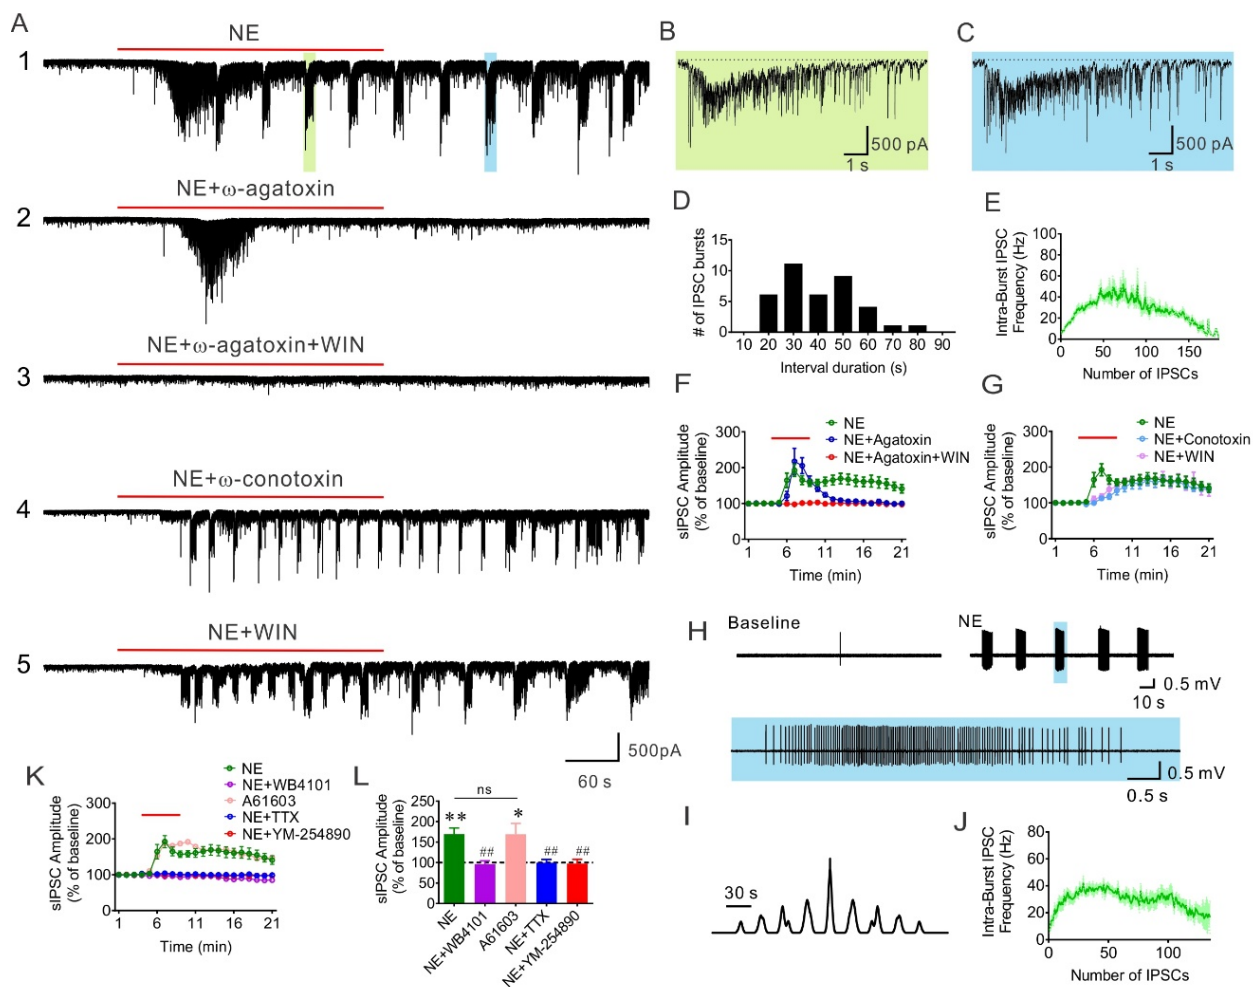

Figure 3.  $\alpha$ 1A noradrenergic activation of PV interneurons generates phasic IPSC bursts in BLA principal cells. (A<sub>1-5</sub>) Representative recordings showing the effect of different treatments on NE-induced repetitive IPSC bursts in the BLA principal neurons. 1, NE application induced phasic IPSC bursts following an initial increase in IPSCs. 2, Blocking PV neuron-mediated transmission with the P/Q type calcium channel blocker  $\omega$ -agatoxin selectively abrogated the NE-induced repetitive IPSC bursts, but not the initial increase in IPSCs. 3, The remaining IPSCs insensitive to  $\omega$ -agatoxin were blocked by CB1 receptor activation WIN 55,212-2. 4, Pretreatment of a slice with the N-type calcium channel blocker  $\omega$ -conotoxin selectively inhibited the NE-induced initial increase of IPSCs, but not the repetitive IPSC bursts. 5, Application of the CB1 receptor agonist did not affect the repetitive IPSC bursts, but blocked the NE-induced initial IPSC increase. (B, C) Expanded traces of individual IPSC bursts in A1 (indicated with green and blue shading) showing the fast acceleration in the intra-burst IPSC frequency and resulting depression in the baseline holding current (indicated with dashed lines) induced by NE. (D) histogram showing the distribution of phase durations of NE-induced repetitive IPSC bursts (38 bursts from 16 cells). (E) Mean instantaneous intra-burst IPSC frequency ( $\pm$  SEM) over the course of NE-stimulated accelerating IPSC bursts. (F) Time course of the effect of blocking P/Q-type calcium channels on sIPSC amplitude. The NE-induced plateau increase in sIPSC amplitude was blocked by  $\omega$ -agatoxin (P/Q blocker), while the peak increase, which corresponds to the NE-induced initial increase in IPSCs shown in (A)2, was unaffected. The  $\omega$ -agatoxin-insensitive IPSCs were blocked by CB1 receptor activation with WIN 55,212-2, corresponding to the recording in (A)3. (G) Time course of the effect of blocking N-type calcium channels and activating CB1 receptors on sIPSC amplitude. Both treatments selectively eliminate the NE-induced initial increase in IPSCs, with little effect on NE-induced repetitive IPSC bursts, which corresponds to the recordings in (A)4 and (A)5. (H) Representative loose-seal extracellular recording showing the NE-stimulated repetitive bursts of action potentials in a PV interneuron. A burst of action potentials indicated by the blue box was expanded to show the accelerating intra-burst IPSC frequency. (I) Autocorrelation showing the rhythmicity of NE-induced AP bursts in the PV interneuron shown in H. (J) Mean instantaneous intra-burst action potential frequency ( $\pm$  SEM) over the course of PV action potential bursts induced by NE. (K, L) Mean change in sIPSC amplitude over time in response to NE (16 cells from 5 mice), NE +  $\alpha$ 1A receptor antagonist WB4101 (7 cells from 4 mice), NE +  $\alpha$ 1A receptor agonist A61603 (10 cells from 4 mice), NE + TTX (10 cells from 5 mice), NE + Gq antagonist YM-254890 (8 cells from 3 mice); Paired *t* test, NE vs. baseline, *p* = 0.0003, A61603 vs. baseline, *p* = 0.023, \*, *p* < 0.05, \*\*, *p* < 0.01; One-Way ANOVA, *F* (4, 46) = 6.22, *p* = 0.0034, Dunnett's multiple comparisons test, NE vs. NE + WB4101, *p* = 0.0098, NE vs. A61603, *p* > 0.99, NE vs. NE + TTX, *p* = 0.0052, NE vs. NE + YM-254890, *P* = 0.0078, ##, *p* < 0.01, ns, not significant; values at time = 13 min were used to compare  $\omega$ -agatoxin-sensitive IPSCs.

To directly test whether NE activates repetitive bursts of action potentials in PV interneurons, extracellular loose-seal recordings of PV interneurons were performed in slices from PV-Cre animals crossed with Ai14 reporter mice, in which the PV interneurons express tdTomato. Application of NE (100  $\mu$ M) induced repetitive bursts of accelerating action potentials in these neurons that recurred at intervals of tens of seconds ( $0.03 \pm 0.006$  Hz, *n* = 7 cells), similar

to the NE-induced IPSC bursts in the principal neurons (Fig. 3H-J). Note that NE failed to activate the PV neurons when they were recorded in the whole-cell current clamp configuration, suggesting that the intracellular signaling mechanism necessary to generate the NE response was washed out with the dialysis of the cytosol. Overall, these data suggest that activation of PV interneurons by NE generates repetitive IPSC bursts that resemble those stimulated by chemogenetic activation of PV interneurons.

To determine whether the NE-induced IPSC bursts are mediated by activation of Gq-coupled adrenoceptors, we first tested for the adrenoceptor subtype dependence of the NE-induced increase in IPSCs. Whereas the  $\beta$  adrenoceptor antagonist propranolol (10  $\mu$ M) had no effect on the bursts, the NE-induced IPSC bursts were abolished by the broad-spectrum  $\alpha$ 1 adrenoceptor antagonist prazosin (10  $\mu$ M) (supplementary Fig. 3D-G). The NE-induced increase in IPSCs was also abolished by the  $\alpha$ 1A adrenoceptor-selective antagonist WB4101 (1  $\mu$ M) and mimicked by the  $\alpha$ 1A adrenoceptor-selective agonist A61603 (2  $\mu$ M) (Fig. 3K, L, supplementary Fig. 3H-J). These results suggest  $\alpha$ 1A adrenoceptor dependence of NE-induced inhibitory synaptic inputs to BLA principal cells. Consistent with the  $\alpha$ 1A adrenoceptor signaling through Gq, blocking Gq activation with the  $G\alpha_{q/11}$  inhibitor YM-254890 eliminated all NE-induced IPSCs (Fig. 3K, L, supplementary Fig. 3H-J). In addition, blocking spiking activity with TTX also inhibited the NE-induced increase in IPSCs (Fig. 3K, L, supplementary Fig. 3H-J). Therefore, like the chemogenetically-induced phasic IPSC bursts, the NE-induced repetitive IPSC bursts were mediated by Gq activation in presynaptic PV interneurons.

It has been reported that the commercial antibodies against  $\alpha$ 1 adrenoceptors are not specific (Jensen et al., 2008). Therefore, to test whether PV interneurons in the BLA express  $\alpha$ 1A adrenoceptors, we took advantage of a global  $\alpha$ 1A adrenoceptor knockout mouse line (adra1A KO) to observe the distribution of the receptor indirectly. In this model, a lacZ gene



**Figure 4.**

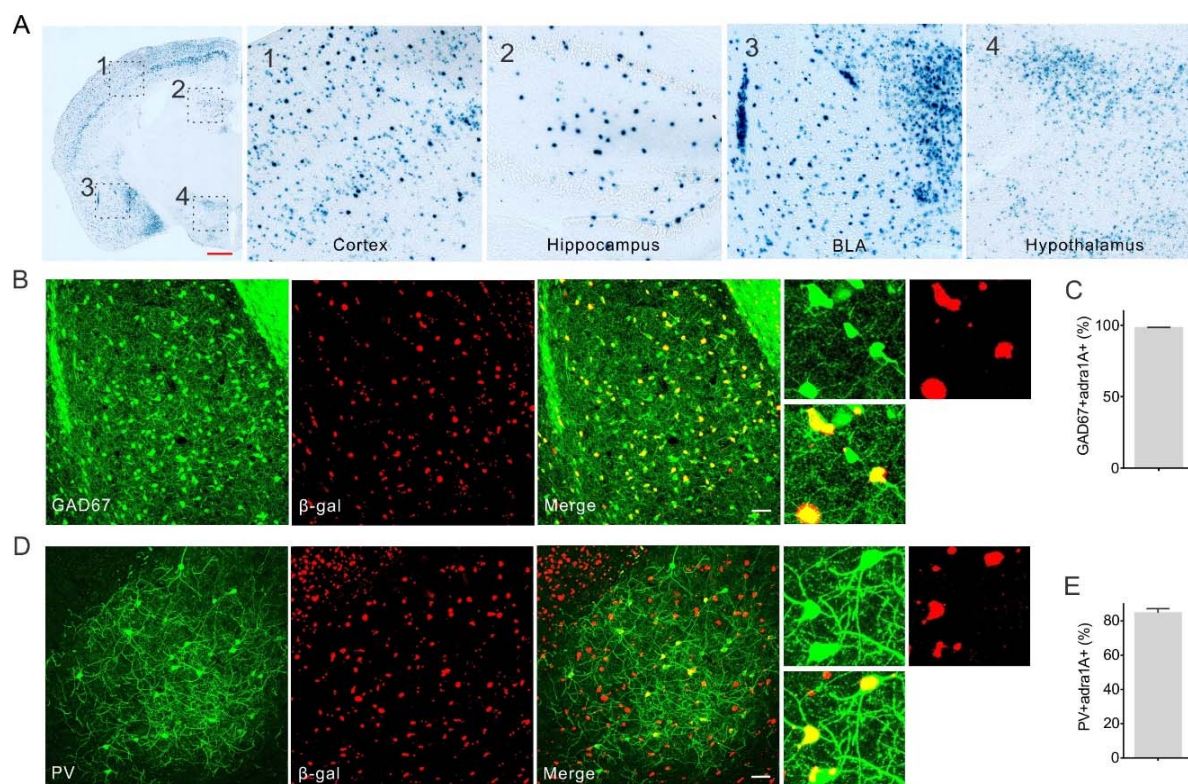

Figure 4. Expression of  $\alpha 1A$  adrenoreceptors in BLA PV interneurons. (A) Staining of  $\beta$ -galactosidase showing the expression of  $\alpha 1A$  adrenoreceptors in *adra1A* KO mice. (1-4) High-magnification images of areas indicated by dashed boxes showing the cortex (1), the hippocampus (2), the basolateral amygdala (3), and the hypothalamus (4). Scale bar, 500  $\mu$ m. (B) Colocalization of the  $\beta$ -gal signal with GFP expression in GABA interneurons in the BLA. Scale bar, 50  $\mu$ m. (C) Percentage of total GAD67-positive cells in the BLA that were positive for  $\beta$ -gal ( $98.4 \pm 0.18\%$ , N=302 cells, 3 sections from 2 animals). (D) Colocalization of the  $\beta$ -gal signal with GFP expression in PV interneurons labelled by injection of Cre-dependent virus in PV-Cre mice. Scale bar, 50  $\mu$ m. (E) Percentage of GFP-labelled PV interneurons that were positive for  $\beta$ -gal ( $84.7 \pm 2.46\%$ , N= 134 cells, 6 sections from 2 animals).

cassette is placed in frame with the first exon of the *adra1A* gene, which allows the visualization of  $\alpha 1A$  adrenoreceptor expression by histochemical staining for  $\beta$ -galactosidase activity with X-gal (Rokosh & Simpson, 2002). We found the *adra1A* gene to be expressed at high levels in the cortex, hippocampus, amygdala, and hypothalamus (Fig. 4 A). In the BLA, we observed a sparse distribution of X-gal-stained cells, which was suggestive of labeled interneurons. To test for the GABA neuron identity of the X-gal-stained cells, we crossed the *adra1A* KO mouse with a *Gad67*-

eGFP mouse, in which all inhibitory interneurons in the BLA express GFP (Tamamaki et al., 2003). Adra1A KO x Gad67-eGFP brains were imaged and analyzed for X-gal and GFP co-staining (Levitsky et al., 2013). To combine the  $\beta$ -galactosidase histochemistry with confocal fluorescence imaging without occlusion of the GFP signal, we performed repeated confocal imaging at the same location to track GFP-positive cells before and after the X-gal staining. The sparsely distributed X-gal-labeled cells showed a 98.37% overlap with GFP-labeled GABAergic cells (Fig. 4 B, C). We next tested for the expression of  $\alpha$ 1A adrenoreceptors in PV interneurons by injecting a Cre-dependent AAV virus expressing mCherry into the BLA of PV-Cre mice crossed with the adra1A KO mouse (PV-Cre::adra1A KO) and examining the ratio of co-labeled PV interneurons and X-gal-labeled neurons. Two weeks after virus injection, we observed most of the labeled PV interneurons to be positive for X-gal (84.7 %) (Fig. 4 D, E). Together, these data demonstrate that  $\alpha$ 1A adrenoreceptors are selectively expressed in GABAergic interneurons in the BLA, including in most of the PV interneurons.

Multiple neurotransmitter receptors couple to  $G\alpha_{q/11}$  to enhance neuronal excitability, suggesting other neuromodulators may also induce similar phasic IPSC bursts when acting on PV interneurons. Hence, we also tested the effect of serotonin, another neuromodulator that regulates BLA neural circuits (Jiang et al., 2009), on IPSC bursts in BLA principal neurons. With the blockade of glutamatergic transmission with DNQX (20  $\mu$ M) and APV (40  $\mu$ M) and CCK basket cell-mediated transmission with the CB1 agonist WIN55,212-2 (1  $\mu$ M), we found that serotonin (100  $\mu$ M) also induced repetitive bursts of IPSCs that were inhibited by the P/Q calcium channel blocker,  $\omega$ -agatoxin (0.5  $\mu$ M), and by an antagonist of the Gq-coupled 5HT2A receptor, MDL 100907 (1  $\mu$ M) (Supplementary Fig 4). These data suggest that serotonin also stimulates a phasic synaptic output from PV interneurons, and indicate that Gq activation of PV interneurons can serve as a general



cellular mechanism for different neuromodulators to regulate BLA neural circuit activity under different emotional states.

### **Gq signaling in PV cells suppresses BLA gamma oscillations *ex vivo***

PV interneurons are critically involved in the generation of gamma-frequency oscillations, which are phase-locked to PV neuron action potentials during tonic high-frequency spiking activity (Bartos et al., 2007; Buzsáki et al., 2012; Hájos et al., 2004). As Gq activation in PV interneurons generated phasic action potentials in the PV cells and synchronized repetitive IPSC bursts in the principal cells of the BLA, we postulated that Gq-mediated modulation of PV cells reconfigures pattern generation among BLA networks. To address this, we recorded the spiking responses in BLA PV interneurons and principal cells and the local field potential responses to PV neuron Gq activation after viral transduction of the Gq-DREADD in BLA PV interneurons.

Loose-seal patch clamp recordings were performed to record spiking activity in Gq-expressing PV neurons using an extracellular potassium concentration that was increased from 2.5 mM to 7.5 mM to increase spontaneous firing. Strikingly, in all the PV interneurons that displayed spontaneous tonic firing under these conditions (n=7 cells, range: 9.7 to 32.2 Hz, mean:  $18.56 \pm 3.4$  Hz), bath application of CNO (5  $\mu$ M) transformed the firing pattern of the PV cells from a tonic to a phasic spiking pattern, rather than superimposing the bursts on the baseline tonic spiking activity (Fig. 5A, B). This indicated that Gq activation in the PV interneurons causes a switch in the operational mode of the PV cells from tonic to phasic activity.

To determine the effect of the PV-mediated phasic IPSC bursts on the firing pattern of the BLA principal neurons, we recorded from the principal neurons in the whole-cell current-clamp recording configuration with a potassium gluconate solution in the recording pipette and activated the Gq-DREADDs in PV interneurons with bath application of CNO (5  $\mu$ M). The

membrane potential of recorded principal cells was held above threshold with positive current injection to elicit tonic 2-5 Hz action potential firing, the range of spontaneous spiking activity observed in these cells *in vivo* (Herry et al., 2008; Woodruff & Sah, 2007). Consistent with the change in baseline holding current caused by the accelerating IPSC bursts, activation of repetitive IPSC bursts with CNO application induced prominent oscillatory hyperpolarizations of the membrane potential, shifting the firing pattern of BLA principal cells from tonic to phasic, characterized by slowly oscillating spike bursts at  $0.035 \pm 0.006\text{Hz}$  (Fig. 5C, D). Together, these data reveal a novel regulatory role for fast spiking interneurons in controlling BLA principal neuron activity patterns in response to Gq activation.

**Figure 5.**

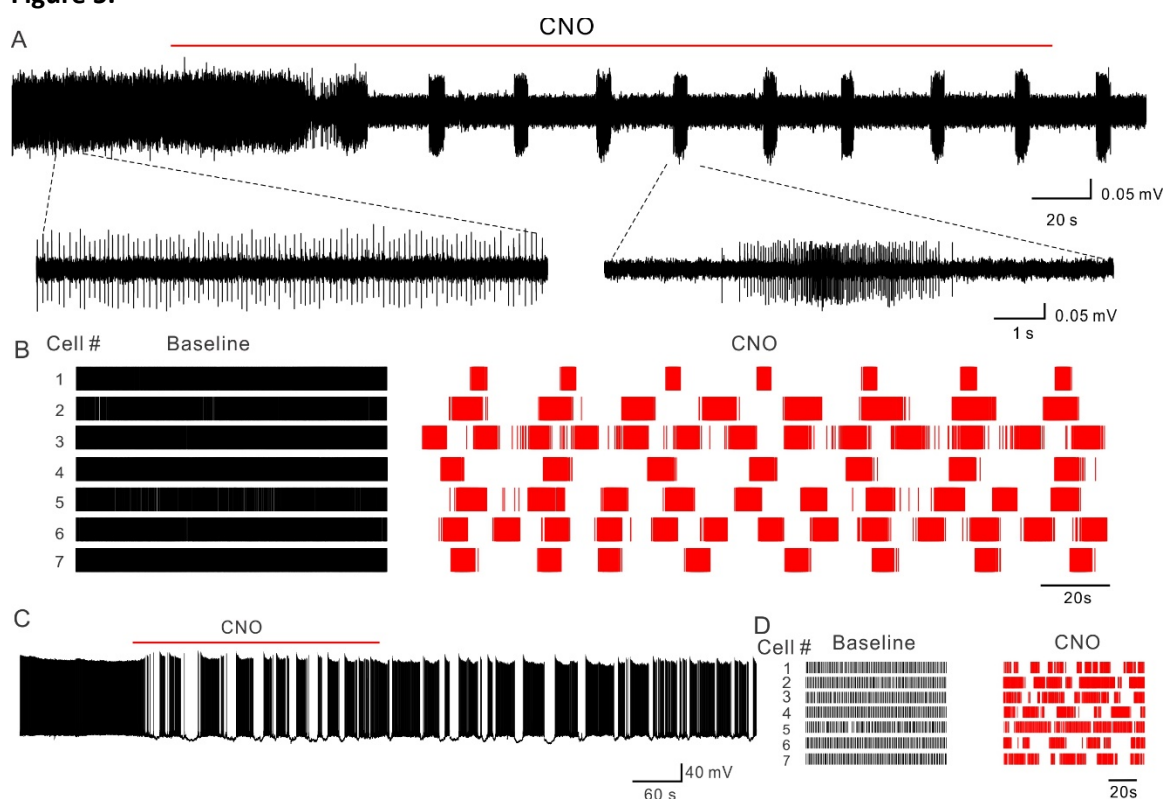

Figure 5. Burst firing in PV interneurons transforms BLA neural activity. (A), A representative recording showing that chemogenetic activation of PV interneurons switches the firing pattern of PV cells from tonic to phasic. Below: Traces were expanded to show the tonic firing in the baseline and burst firing after CNO application. (B), Raster plots of spiking activity in recordings from 7 PV interneurons that show the transformation of tonic spiking to phasic spiking by CNO. (C), A representative current clamp recording from a principal neuron showing that Gq-activation in PV cells transforms the firing pattern of a BLA principal neuron from tonic to phasic. (D) Raster plots of spiking activity in recordings from 7 principal neurons that show the transformation of tonic spiking to phasic spiking by CNO.

### **Gq signaling in BLA PV cells promotes state switches in amygdalo-frontal networks *in vivo***

Given the robust influence of Gq signaling on BLA PV interneuron activity pattern transitions from tonic firing to burst firing, we postulated that Gq activation in PV neurons may reconfigure BLA population-level neural activity. To test this, we recorded the BLA-frontal cortex mesoscale network oscillations using local field potential (LFP) recordings in the BLA paired with ipsilateral frontal cortex (FrC) electroencephalogram (EEG) recordings *in vivo* in PV-Cre animals virally transduced to express hM3D in BLA PV interneurons in the BLA (Fig. 6 A-D). Activation of hM3D in BLA PV interneurons with intraperitoneal (IP) injection of 5 mg/kg (1 mg/ml) CNO decreased the power of both “slow” (30-70 Hz) and “fast” (70-120 Hz) gamma frequency oscillations in both the BLA and FrC compared to IP saline injection (Fig. 6 E-H).

**Figure 6.**

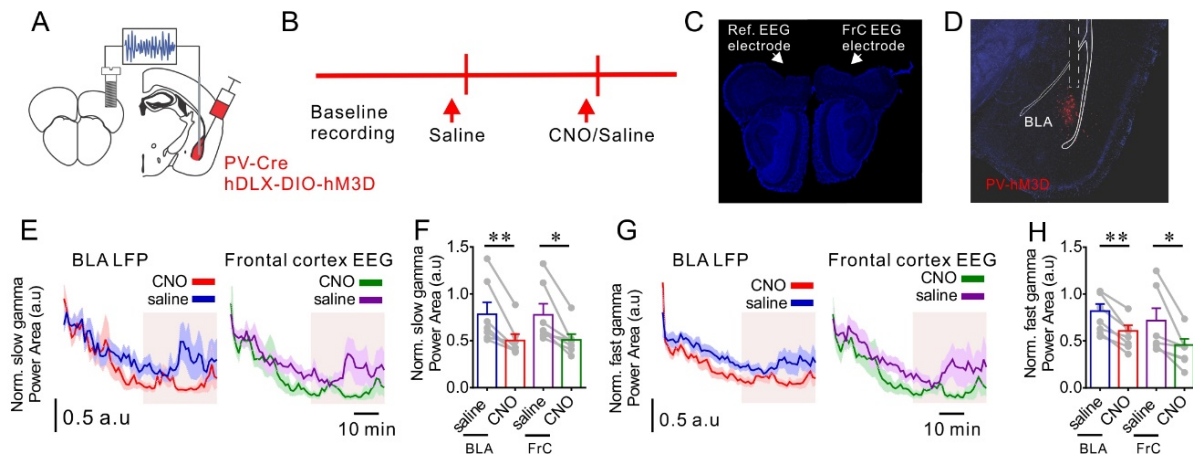

Figure 6. Gq signaling in BLA PV interneurons desynchronizes gamma oscillations in amygdalo-frontal circuits *in vivo*. (A) Schematic illustrating combined *in vivo* EEG recording in the frontal cortex and LFP recording in the BLA, as well as hM3D-expressing and control virus injection in the BLA of PV-Cre mice. (B) Experimental timeline for EEG and LFP recordings before (baseline) and after I.P. injection of saline followed by saline or CNO. (C) Representative image showing the placement of the reference and EEG recording screws on the frontal cortex (arrows). (D) Representative image showing the LFP recording electrode placement (dashed lines) and hM3D distribution in the BLA. (E) Normalized slow gamma power (to baseline) over time in the BLA and the frontal cortex (FrC) after injection of saline or CNO. (F) Mean ( $\pm$  SEM) normalized BLA and FrC slow gamma power for respective analysis windows marked with the pink shading in (E). Paired *t*-test, Saline vs CNO,  $p = 0.0086$  (BLA),  $p = 0.014$  (FrC), \*,  $p < 0.05$ , \*\*,  $p < 0.01$ . (G) Normalized fast gamma power (to baseline) over time in the BLA and the frontal cortex (FrC) after injection of saline or CNO. (H) Mean ( $\pm$  SEM) normalized BLA and FrC fast gamma power for respective analysis windows marked with the pink shading in (G). Paired *t*-test, Saline vs CNO,  $p = 0.0019$  (BLA),  $p = 0.027$  (FrC). \*,  $p < 0.05$ , \*\*,  $p < 0.01$ . au = arbitrary units.

We next tested whether BLA  $\alpha 1A$  adrenoreceptor activation similarly modulates amygdalo-frontal network oscillations using an *in-vivo* neuropharmacological approach (Fig. 7A). Intra-BLA infusion of NE (9.88 mM, 0.2  $\mu$ L) reduced both the BLA and frontal EEG fast and slow gamma oscillations, and this effect was abolished by intra-BLA pretreatment with the  $\alpha 1A$ -selective adrenoreceptor antagonist WB4101 (10  $\mu$ M; 0.2  $\mu$ L) (Fig. 7B-I). These data indicate that, like hM3D activation,  $\alpha 1A$  adrenoreceptor-dependent noradrenergic signaling in BLA PV neurons desynchronizes gamma oscillations in amygdalo-frontal networks.

**Figure 7.**

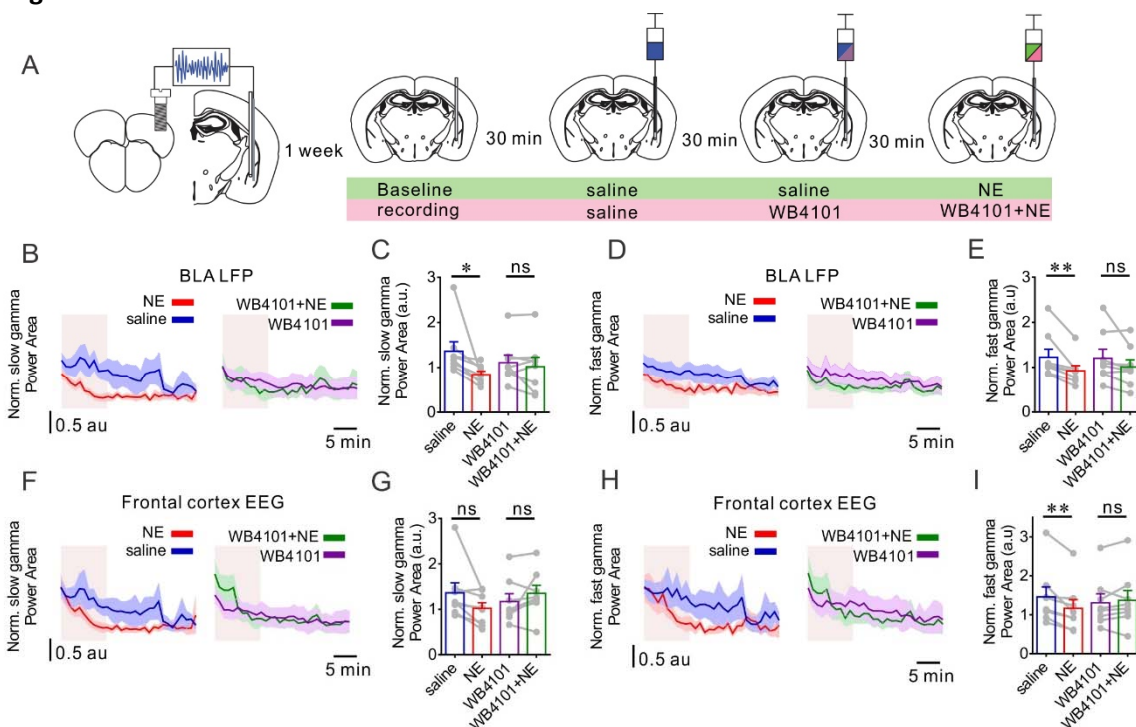

Figure 7. Noradrenergic activation of BLA Gq signaling desynchronizes gamma oscillations in amygdalo-frontal circuits *in vivo*. (A) Schematic illustrating experimental paradigm combining *in vivo* BLA LFP recording, frontal cortex (FrC) EEG recording, and intra-BLA adrenoceptor agonist/antagonist/vehicle microinfusion. After baseline recording for 30 min, saline was administered twice in the BLA to control for the effect of infusion on LFP. The same three-infusion design was maintained in the  $\alpha 1A$  antagonist group. (B) Normalized BLA slow gamma power over time (to baseline recording) from experiments with intra-BLA infusion of NE and NE +  $\alpha 1A$  antagonist WB4101. (C) Mean (+/- SEM) normalized BLA slow gamma power for respective analysis windows in the shaded area shown in (B). Paired *t*-test, NE vs. saline,  $p = 0.039$ , NE + WB4101 vs WB4101,  $p = 0.35$ , \*  $p < 0.05$ , ns, not significant. (D) Normalized BLA fast gamma power over time (to baseline recording) from experiments with intra-BLA infusion of NE and NE +  $\alpha 1A$  antagonist WB4101. (E) Mean (+/- SEM) normalized BLA fast gamma power for respective analysis windows in the shaded area shown in (D). Paired *t*-test, NE vs saline,  $p = 0.0099$ , NE + WB4101 vs WB4101,  $p = 0.099$ , \*\*  $p < 0.01$ , ns, not significant. (F) Normalized FrC slow gamma power over time (to baseline recording) from experiments with intra-BLA infusion of NE and NE +  $\alpha 1A$  antagonist WB4101. (G) Mean (+/- SEM) normalized FrC slow gamma power for respective analysis windows in the shaded area shown in (F). Paired *t*-test, NE vs saline,  $p = 0.067$ , NE + WB4101 vs WB4101,  $p = 0.19$ , ns, not significant. (H) Normalized FrC fast gamma power over time (to baseline recording) from experiments with intra-BLA infusion of NE and NE +  $\alpha 1A$  antagonist WB4101. (I) Mean (+/- SEM) normalized FrC fast gamma power for respective analysis windows in the shaded area shown in (H). Paired *t*-test, NE vs saline,  $p = 0.0061$ , NE + WB4101 vs WB4101,  $p = 0.42$ , \*\*  $p < 0.01$ , ns, not significant

### **$\alpha$ 1A noradrenergic Gq activation of BLA PV interneurons enhances conditioned fear expression**

A similar suppression of fast gamma oscillations in amygdalo-frontal networks has been reported during conditioned fear expression (Stujenske et al., 2014), which suggests a possible BLA PV Gq-mediated neuromodulatory control of fear memory formation. Therefore, we next tested the hypothesis that Gq signaling in BLA PV interneurons promotes conditioned fear expression. To do this, we took advantage of a virally mediated selective  $\alpha$ 1A adrenoreceptor re-expression strategy bilaterally in the BLA of global *adra1A* knockout mice.

To confirm our selective  $\alpha$ 1A adrenoreceptor re-expression strategy faithfully restores proper function seen with endogenous  $\alpha$ 1A adrenoreceptors, we examined NE-induced IPSC bursts using whole-cell recordings in principal neurons in brain slices from global *adra1A*-knockout mice with and without re-expression of *adra1A* specifically in BLA PV neurons. To selectively re-express  $\alpha$ 1A adrenoreceptors in BLA PV interneurons, a Cre-dependent AAV virus expressing  $\alpha$ 1A-mCherry (AAVdj-hDLX-DIO- $\alpha$ 1A-mCherry) was injected bilaterally into the BLA of PV-Cre::*adra1A* KO mice (Fig. 8A). In slices from *adra1A* KO mice, NE and the selective  $\alpha$ 1A adrenoreceptor agonist A61603 failed to generate the IPSC bursts in BLA principal cells seen in wild-type mice (Fig. 8B-D), confirming the specific  $\alpha$ 1A adrenoreceptor dependence of the NE-induced IPSC burst generation. Re-expression of  $\alpha$ 1A adrenoreceptors specifically in BLA PV interneurons of *adra1A* KO mice rescued the phasic IPSC bursts induced in the principal neurons by NE; the NE-induced IPSC bursts showed the characteristic accelerating intra-burst IPSC frequency and low-frequency burst recurrence ( $0.032 \pm 0.002$  Hz) seen in principal cells in slices from wild-type mice (Fig. 8A-F).

Having demonstrated the validity of our viral re-expression model, we next investigated the role of BLA PV neuron  $\alpha$ 1A noradrenergic activation in the modulation of conditioned fear expression. Three weeks after  $\alpha$ 1A adrenoreceptor re-expression in the BLA with bilateral injections of AAVdj-hDLX-DIO- $\alpha$ 1A-mCherry into the BLA of PV-Cre::*adra1A* KO mice (Fig. 8G), the



mice were subjected to a standard auditory-cued fear conditioning paradigm (Fig. 8H). Selective rescue of the  $\alpha$ 1A receptors bilaterally in BLA PV interneurons of the PV-Cre::*adra1A* KO mice resulted in enhanced fear memory retrieval on day 2 compared with the PV-Cre::*adra1A* KO mice expressing mCherry alone (Fig. 8I). Note that  $\alpha$ 1A re-expression in the PV neurons appeared to reverse a loss of fear memory retrieval in the PV-Cre::*adra1A* KO mouse. The impairment in fear retrieval was due presumably to Cre expression in the PV neurons and not the loss of  $\alpha$ 1A receptors, since the  $\alpha$ 1A receptor deletion in the global *adra1A* KO mouse (i.e., not crossed with the PV-Cre mouse) did not show a decrease in fear memory retrieval compared to the wild type mouse (data not shown). Thus,  $\alpha$ 1A adrenoreceptor signaling in BLA PV interneurons increases the expression of fear memory.

**Figure 8.**

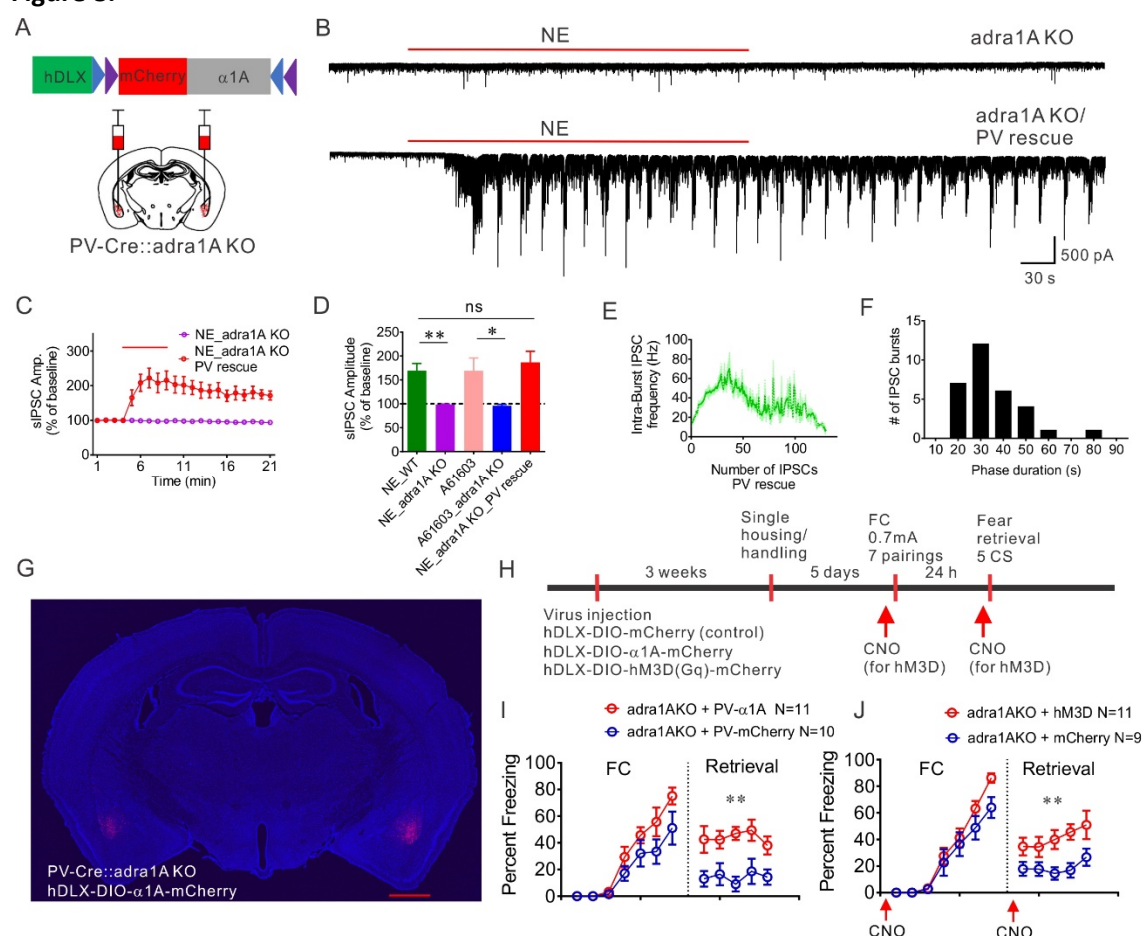

Figure 8. Rescue of  $\alpha$ 1A-Gq signaling in BLA PV interneurons in global *adra1A* KO mice facilitates fear memory formation. (A) Representative traces showing that the NE-induced increase in IPSCs is lost in the global *adra1A* KO mouse and that replacement of the  $\alpha$ 1A adrenoceptors selectively in the PV interneurons with AAV injection in the BLA (shown on the right) rescued the NE-induced repetitive IPSC bursts. (B) Time course of NE effect on sIPSC amplitude in *adra1A* KO mice with or without re-expression of  $\alpha$ 1A adrenoceptors in PV interneurons. (C) Mean change in sIPSC amplitude in BLA principal neurons in response to NE or the  $\alpha$ 1A agonist A61603 in slices from wild type (WT) and *adra1A* KO mice. Re-expression of  $\alpha$ 1A adrenoceptors in PV interneurons restored the noradrenergic facilitation of sIPSC amplitude in BLA principal neurons. (NE\_WT: 16 cells from 5 mice; NE\_*adra1A* KO: 9 cells from 4 mice; A61603\_WT: 10 cells from 4 mice; A61603\_*adra1A* KO: 7 cells from 3 mice; NE\_*adra1A* KO\_PV rescue: n = 7 cells from 3 mice) (Unpaired *t* test, A61603\_WT vs. A61603\_*adra1A* KO: *p* = 0.039, \*, *p* < 0.05) (One-Way ANOVA, *F* (2, 27) = 7.43, *p* = 0.0025, Dunnett's multiple comparisons test, NE\_WT vs. NE\_*adra1A* KO: *p* = 0.0046, NE\_WT vs. NE\_*adra1A* KO\_PV rescue: *p* = 0.68, \*\*, *p* < 0.01, ns, not significant). (D) Mean instantaneous intra-burst IPSC frequency over the course of the burst, showing that rescued IPSC bursts display an accelerating intra-burst frequency similar to NE-induced bursts in WT mice. (E) A histogram showing the distribution of the phase duration of NE-induced repetitive IPSC bursts following BLA  $\alpha$ 1A adrenoceptor rescue in *adra1A* KO mice. (F) Representative image showing expression of  $\alpha$ 1A-mCherry fusion protein after bilateral injections of conditional AAV virus in the BLA of PV-Cre::*adra1A* KO mice. Scale bar, 1 mm. (G) Experimental timeline for virus injection and fear conditioning. PV-Cre::*adra1A* KO mice were injected with conditional AAVs expressing Cre-dependent  $\alpha$ 1A-mCherry or Gq-DREADD to rescue  $\alpha$ 1A adrenoceptor mediated Gq signaling in BLA PV interneurons. Control PV-Cre::*adra1A* KO mice were injected with conditional AAVs expressing only mCherry. For Gq-DREADD rescue experiments, CNO (5 mg/kg) was administered I.P. 30 min prior to commencement of the fear acquisition and again 30 min prior to commencement of the fear retrieval (red arrows) in both Gq-DREADD and mCherry groups. (H) Replacement of  $\alpha$ 1A adrenoceptors selectively in BLA PV interneurons did not have a significant effect on the acquisition (Repeated measures Two-Way ANOVA, *F* (1, 19) = 3.49, *p* = 0.078 compared to control virus-injected PV-Cre::*adra1A* KO group), but facilitated the retrieval of the fear memory (Repeated measures Two-Way ANOVA, *F* (1, 19) = 18.47, *p* = 0.0004). \*\* *p* < 0.01 compared to control virus-injected PV-Cre::*adra1A* KO group. (I) Rescue of Gq signaling in BLA PV interneurons in *adra1A* KO mice with excitatory DREADD had no significant effect on the fear memory acquisition (Repeated measures Two-Way ANOVA, *F* (1,18) = 2.15, *p* = 0.16 compared to control virus injected PV-Cre::*adra1A* KO group), but enhanced the fear memory retrieval (Repeated measures Two-Way ANOVA, *F* (1,18) = 11.17, *p* = 0.0036). \*\* *p* < 0.01 compared to control virus injected PV-Cre::*adra1A* KO group.

We next tested the selective activation of hM3D in BLA PV interneurons for changes in fear conditioning to determine the role of PV neuron Gq modulation in fear memory formation. CNO was administered IP 30 minutes prior to the beginning of the fear acquisition trials on day one, and again 30 minutes prior to the beginning of the fear memory retrieval trials on day two (Fig. 8G). Similar to the effect of  $\alpha$ 1A adrenoceptor rescue on conditioned fear expression, Gq



activation in BLA PV interneurons significantly enhanced fear memory expression (Fig. 8I).

Therefore, Gq signaling in BLA PV interneurons promotes conditioned fear expression.

## Discussion

Our findings reveal a PV cell type-specific neuromodulatory mechanism for the BLA network-driven coordination of emotionally salient brain state transitions. Gq-coupled DREADD or  $\alpha 1A$  adrenoreceptor activation in PV cells generated a highly stereotyped phasic bursting pattern of action potentials that drove repetitive, synchronized bursts of IPSCs in postsynaptic BLA principal neurons. Gq activation in the BLA PV interneurons desynchronized BLA gamma oscillations *ex vivo* and in both BLA and frontal cortical circuits *in vivo*, revealing a BLA PV interneuron control of gamma oscillations in a BLA-frontal cortex network. Finally, we found that BLA PV-Gq signaling-induced gamma desynchronization enhanced the retrieval of an auditory cue-conditioned fear memory.

In contrast to the canonical electrophysiological property of PV interneurons to fire sustained high-frequency action potentials upon depolarization, we observed these cells to generate repetitive bursts of action potentials in response to  $\alpha 1A$  and hM3D receptor-induced Gq activation. The PV neuron phasic bursting was dependent on a postsynaptic intrinsic Gq signaling-dependent mechanism, and not mediated by local circuits or depolarization-induced activation, because the phasic activity was not suppressed by blocking ionotropic glutamate and GABA receptors and was not induced with sustained photostimulation of the PV neurons. Our findings reveal, therefore, an important role for Gq neuromodulation in changing the operational mode of PV neurons, from tonic activation to alternating cycles of activation and inhibition, via an intrinsic mechanism independent of depolarization and fast chemical synaptic transmission. The

Gq-dependent cell signaling mechanism responsible for generating phasic bursting in the PV interneurons is not known.

Parvalbumin interneurons are critically involved in the generation of gamma-frequency oscillations in the cortex and hippocampus (Bartos et al., 2007; Buzsáki et al., 2012; Cardin et al., 2009; Hájos et al., 2004; Sohal et al., 2009). Mechanistic studies in these structures indicate that tonic PV neuron activity provides inhibitory signaling to principal neurons that drives the local gamma rhythm, demonstrated by phase locking of PV neuron activity to the gamma cycle (Bartos et al., 2007; Hájos et al., 2004) and by optogenetic activation and inhibition of PV neuron activity (Antonoudiou et al., 2021; Cardin et al., 2009; Sohal et al., 2009). Like in cortical structures, PV interneurons in the BLA densely target the perisomatic region of principal neurons to modulate amygdalar output (Davis et al., 2017; Ozawa et al., 2020; Vereczki et al., 2016; Veres et al., 2017). Therefore, altering BLA PV activity patterns is likely to have a robust effect on BLA network oscillations. We found that Gq activation in BLA PV neurons transformed the tonic activity pattern of the PV neurons into a bursting pattern of action potentials and inhibitory synaptic inputs to the BLA principal cells. Consistent with tonic PV neuron activity promoting gamma oscillations, transforming PV neuron tonic activity to phasic activity by either chemogenetic manipulation or  $\alpha 1A$  adrenoreceptor activation decreased the gamma power activity locally in the BLA and across the BLA-frontal cortex network. This PV-Gq modulation of the BLA-frontal cortex network state was mediated locally within the BLA, rather than via activation of extra-BLA circuits, because the hM3D and  $\alpha 1A$  adrenoreceptor activation *in vivo* was spatially restricted to the BLA.

Parvalbumin interneurons in the BLA target the perisomatic region of hundreds of postsynaptic principal neurons to control BLA output. Paired recordings from neighboring principal neurons revealed that a large percentage of the PV-mediated bursts of IPSCs are synchronized. In addition, the PV-mediated IPSC bursts transformed the firing pattern of the

principal neurons from tonic to a slow phasic activity. The long interval (20-60 s) of synchronized IPSC bursts in the principal neurons suggested this as a possible mechanism for the generation of infra-slow oscillations (0.01-0.1 Hz) in the BLA. However, while we measured a decrease in gamma power, we did not detect a significant change in infra-slow oscillations in the BLA with *in vivo* field potential recordings, which may be due to the asynchronous nature of the IPSC bursts generated by different presynaptic PV neurons (e.g., see Fig. 2). Other than the disruption of gamma wave generation, it's not known whether the synchronous phasic PV neuron inhibitory inputs to the BLA principal neurons play a physiological role in pattern generation in the BLA.

BLA PV interneuron activity robustly coordinates activity in downstream frontal cortical circuits in fear states (Davis et al., 2017; Ozawa et al., 2020). Given the influence of BLA noradrenergic signaling on promoting fear states, we examined what significance the PV neuron  $\alpha 1A$  adrenoreceptor-mediated desynchronization of amygdalo-frontal gamma oscillations has in promoting fear states. Genetic re-expression of  $\alpha 1A$  adrenoreceptors in PV interneurons bilaterally in the BLA of *adra1A* global knockout mice and hM3D-Gq activation in BLA PV interneurons in wild type mice enhanced conditioned fear expression. Therefore, the Gq-mediated transition in BLA PV interneuron patterned output is important for promoting BLA fear state transitions. Conditioned fear expression is associated with amygdalo-frontal suppression of fast gamma oscillatory power (Stujenske et al., 2014). Our data demonstrating that BLA PV Gq signaling via hM3D and  $\alpha 1A$  adrenoreceptor activation desynchronizes fast (and slow) gamma network activity in amygdalo-frontal networks, therefore, reveals a critical role for Gq neuromodulation of BLA PV cells in the expression of fear memory.

Thousands of G protein-coupled receptors converge onto four main classes of known G $\alpha$  proteins (Pierce et al., 2002). Thus, different neurotransmitters acting on their cognate Gq-coupled receptors may have a similar effect on neural activity through activation of the same

signaling pathway. In addition to  $\alpha 1A$  adrenoreceptor-mediated Gq activation of PV interneurons, we also found that activation of Gq-coupled 5-HT<sub>2A</sub> serotonergic receptors generated similar repetitive bursts of IPSCs in BLA principal neurons. Others have reported that acetylcholine also drives repetitive IPSC bursts in pyramidal neurons of the frontal cortex, possibly through the activation of Gq-coupled M1 muscarinic receptors (Kondo & Kawaguchi, 2001), although whether this response is also mediated by PV interneuron activation is not known. Notably, PV interneurons in the hippocampus and BLA stimulated by CCK activation of Gi/o-coupled CCK<sub>B</sub> receptors (Chung & Moore, 2007; Chung & Moore, 2009; Földy et al., 2007; Lee et al., 2011) generate tonic IPSCs in principal neurons. Thus, neuromodulatory excitation of PV interneurons with different GPCR signaling mechanisms may induce distinct output patterns. If the patterned bursts of IPSCs is a generalized PV neuron output mode following activation of Gq-coupled receptors by different neuromodulators, then the specificity of the neuromodulatory regulation must lie in other spatio-temporal properties of the neuromodulatory inputs, such as the timing of the inputs and the somato-dendritic distribution of the synapses or synaptic receptors. Then again, the convergence of disparate neuromodulatory inputs onto the Gq signaling pathway to generate a similar patterned PV neuron output may represent a redundancy of neuromodulatory systems to achieve a common salient network outcome, the desynchronization of BLA circuits in the gamma frequency band, under different environmental conditions. Just as different representations of intrinsic membrane ionic currents in individual neurons and synaptic strengths in neural circuits can be tuned homeostatically to achieve target network outputs (e.g., Prinz and Marder, 2004), so may neuromodulatory inputs be activated variably, alone or in combination, in different individuals under different environmental conditions to arrive at a particular desired brain state.

In conclusion, our findings provide a cell type-specific neuromodulatory mechanism for BLA network-driven transitions in fear-associated brain states. Thus, during conditioned fear recall, BLA PV neurons transition from a tonic, high-frequency pattern to a phasic bursting pattern of activity in response to Gq activation, which suppresses gamma-frequency oscillations locally in the BLA and across the amygdalo-frontal network. This PV neuron-mediated transition in brain network state is necessary for the expression of conditioned fear memory.

## Methods

### Animals

Mice were maintained in an AALAC-approved, temperature-controlled animal facility on a 12-h light/dark cycle with food and water provided *ad libitum*. C57BL/6J (Cat. 000664), PV-Cre (Cat. 017320), and *adra1A* KO mice (Cat. 005039) were purchased from Jackson Laboratories and bred in-house to establish colonies. Heterozygous GAD67-eGFP mice were purchased from Riken BioResource center (Tamamaki et al., 2003) and back-crossed for more than 5 generations with wildtype C57BL/6 mice. All procedures were approved by the Tulane and Tufts University Institutional Animal Care and Use Committees and were conducted in accordance with Public Health Service guidelines for the use of animals in research.

### Stereotaxic Surgery

#### Intracerebral virus injections

##### *Intracellular recording*

Four- to 6-week-old male mice were anesthetized by intraperitoneal injection of ketamine/xylazine (100 mg/kg) and placed in a stereotaxic frame (Narishige, SR-6N). The scalp was cut along the midline and the skull was exposed. Two burr holes were perforated above the BLA with a Foredom drill (HP4-917). Mice were then injected bilaterally with 350 nl of virus into the BLA (AP: -0.8, ML: 3.05, DV: 4.4) through a 33-gauge Hamilton syringe (10 µl) connected to a micropump (World Precision Instrument, UMP-2) and controller (Micro4) at a flow rate of 100 nl per minute. After waiting for 5 minutes following virus injection to minimize virus spread up the needle track, the injection needle was then slowly retracted from the brain. After surgery, the scalp was sealed with Vetbond, a triple antibiotic ointment was applied, and an analgesic (Buprenorphine, 0.05 mg/kg) was injected IP.

### *Extracellular recording and drug application*

Eight- to 10-week-old mice were anesthetized with IP ketamine/Xylazine (100mg/kg; 10mg/kg) and placed in a mouse stereotaxic frame (World Precision Instruments, 502600) over a warm heating pad. Lacri-lube was placed over the subjects' eyes, and slow-release buprenorphine (Buprenorphine SR-LAB, 0.5 mg/kg) was administered subcutaneously for post-operative analgesia. The scalp was shaved, cleaned with ethanol and betadine (3x), then cut along the midline to expose the skull. The skull was leveled, then manually drilled through above the BLA (relative to bregma: AP -1.35, ML  $\pm$  3.3) using a sterile 27G syringe needle. In dual electrode and intra-BLA cannula implantation surgeries, a second hole was manually drilled at AP -3.05, ML  $\pm$  3.3. For viral injections, a pulled glass pipette was used to inject 350nL of virus into the BLA (relative to bregma: AP -1.35, ML  $\pm$  3.3, DV -5.1) at a flow rate of 100nL per minute using positive pressure from a 10mL syringe. After waiting 5 minutes following injection to minimize viral spread up the needle track, the injection needle was then slowly retracted from the brain. For EEG/LFP electrode implants, prefabricated headmounts (Pinnacle Technology Inc, #8201) were mounted to the skull using stainless steel screws that acted as ground, reference, and frontal cortex EEG (relative to bregma: AP +0.75, ML  $\pm$  0.30, DV -2.10) electrodes. One depth electrode (PFA-coated stainless steel, A-M Systems) was implanted in the BLA. For paired intra-BLA cannula and recording implantation, the recording equipment was implanted and fixed to the skull as described. A fabricated guide cannula was inserted over the BLA, through the posterior drilled hole (relative to bregma: AP -3.05, ML  $\pm$  3.3, relative to nearby skull: -3.08) at a 69-degree angle (Supplementary Fig. 5). The cannula was fixed in place with dental cement (A-M Systems, #525000 and #52600) before releasing from stereotaxic arm. After surgery, the scalp was either 1) sealed with Vetbond and triple antibiotic ointment was applied, or 2) covered along with the headmount/guide cannula with dental cement and allowed to cure before removing the animal.

The mice were then taken out of the stereotaxic frame and placed in a heated recovery chamber until conscious.

### **AAV virus development**

For cloning of Cre-dependent hDlx AAV virus, we amplified the hM3D-mCherry and mCherry coding sequence from the plasmid pAAV-hSyn-DIO-hM3D(Gq)-mCherry (a gift from Bryan Roth, Addgene # 44361) (Krashes et al., 2011) and pAAV-hSyn-DIO-mCherry (also a gift from Bryan Roth, Addgene # 50459) and cloned it into a pAAV-hDlx-Flex-GFP vector backbone (a gift from Gordon Fishell, Addgene #83895) (Dimidschstein et al., 2016) at *Accl* and *NheI* cloning sites. The coding sequence of *adra1A* was synthesized from Bio Basic Inc. and cloned into a pAAV-hDlx-Flex backbone. AAV virus from Vigene Biosciences Company was further packaged in AAVdj serotype. All hDlx AAV viruses were diluted to the range of  $10^{11}$  to  $10^{12}$  viral genome per ml with virus dilution buffer containing 350 mM NaCl and 5% D-Sorbitol in PBS.

### **Fear conditioning and retrieval**

3 weeks after virus injection, mice were single housed and handled for more than 5 days before undergoing a fear conditioning paradigm with the Video Fear Conditioning System in a sound attenuated chamber (MED Associates, Inc.). Each chamber is equipped with a metal stainless-steel grid connected to a shock generator (ENV414S Aversive Stimulator). The fear conditioning paradigm consisted of 7 exposures to a continuous tone (7 kHz, 80 db, 30 s duration) as the conditioned stimulus (CS), each of which was co-terminated with an unconditioned aversive stimulus (US) consisting of electric foot shocks (0.7 mA, 2 s duration). The CS-US stimuli were presented at a randomized intertrial interval (ITI, 30-180 s, average = 110 s) in one context, context A. Twenty-four hours later, on day 2, mice were tested for fear retention in a different



context, context B, with a planar floor and a black plastic hinged A-frame insert. During fear memory retrieval, five presentations of CS alone were delivered with an inter-stimulus interval of 60 s. Behavior was recorded with an infrared camera and analyzed with Video Freeze software (Med Associates, Inc.). Mice were considered to be exhibiting freezing behavior if no movement other than respiration was detected for  $\geq 2$  s. Chambers were cleaned with either 70% ethanol or 3% acetic acid before each session of fear conditioning or fear memory retrieval.

## Histology

*Perfusion and cryosectioning:* two weeks after AAV virus injection, *adra1A* KO, PV-Cre, and PV-Cre::*adra1A* KO were deeply anesthetized with ketamine/xylazine (300mg/kg) and perfused transcardially with 10 ml ice-cold PBS (pH 7.4) followed by 20 ml 4% paraformaldehyde (PFA) in PBS. Brains were dissected out, postfixed for 3 hours in 4% PFA in PBS, and cryopreserved with 30% sucrose in PBS for 24 hours at 4°C until the brain sunk to the bottom of the container. Coronal sections (45  $\mu$ m) were cut on a cryostat (Leica) and harvested in 24-well plates filled with PBS.

*Confocal imaging:* Sections from virus-injected PV-Cre and PV-Cre::*adra1A* KO mice containing the BLA were selected, rinsed with PBS (3 x 5 mins), and mounted on gel-coated slides. Confocal images were acquired with a Nikon A1 confocal microscope to capture the DAPI (excitation 405 nm, emission 450 nm), GFP (excitation 488 nm, emission 525 nm), and mCherry (excitation 561 nm, emission 595 nm) signals. For the analysis of colocalization, z stack pictures were imaged under a 40x oil-immersion objective with a step increment of 1.5  $\mu$ m. The number of BLA cells containing colocalized markers were first quantified from merged maximal intensity images from different channels, and then confirmed in z-stack images with ImageJ (NIH).

*X-gal staining:* Sections from adra1A KO mice were rinsed with PBS (3 x 5 min) and incubated in a  $\beta$ -gal staining solution (Roche, Ref # 11828673001) overnight. After  $\beta$ -gal staining, sections were then rinsed in PBS (3 x 5 min), mounted on gel-coated glass slides, coverslipped with Permount mounting medium (Fisher Scientific), and allowed to air dry. Bright-field imaging was performed in a Zeiss Axio Scanner and processed and analyzed with ImageJ (NIH). For fluorescence confocal imaging, brain sections were rinsed with PBS (3 x 5 min), mounted on gel coated coverslips, and then imaged first on the confocal microscope (Nikon A1) before incubating them in the  $\beta$ -gal staining solution. After staining with X-gal, the slices were rinsed with PBS (3 x 5 mins) and the same regions previously imaged using fluorescence confocal imaging were then re-imaged for the X-gal signal with excitation and emission wavelengths of 638 and 700 nm (Levitsky et al., 2013), respectively. The images were then processed and quantified with ImageJ software to determine the ratio of  $\beta$ -gal-positive cells to fluorescent cells with the same procedure described above.

## **Brain slice electrophysiology**

### Patch Clamp

*Slice preparation:* Coronal brain slices containing the BLA were collected from male mice for *ex vivo* electrophysiological recordings. Mice (6 to 9 weeks) were decapitated in a restraining plastic cone (DecapiCone, Braintree Scientific) and the brains were dissected and immersed in ice-cold, oxygenated cutting solution containing the following (in mM): 252 sucrose, 2.5 KCl, 26 NaHCO<sub>3</sub>, 1 CaCl<sub>2</sub>, 5 MgCl<sub>2</sub>, 1.25 NaH<sub>2</sub>PO<sub>4</sub>, 10 glucose. The brains were trimmed and glued to the chuck of a Leica VT-1200 vibratome (Leica Microsystems) and 300  $\mu$ m-thick coronal slices were sectioned. Slices were transferred to a holding chamber containing oxygenated recording artificial cerebrospinal fluid (aCSF) containing (in mM): 126 NaCl, 2.5 KCl, 1.25 NaH<sub>2</sub>PO<sub>4</sub>, 1.3 MgCl<sub>2</sub>, 2.5

CaCl<sub>2</sub>, 26 NaHCO<sub>3</sub>, and 10 glucose. They were maintained in the holding chamber at 34°C for 30 min before decreasing the chamber temperature to ~20°C.

*Patch clamp recording:* Slices were bisected down the midline and hemi-slices were transferred one-at-a-time from the holding chamber to a submerged recording chamber mounted on the fixed stage of an Olympus BX51WI fluorescence microscope equipped with differential interference contrast (DIC) illumination. The slices in the recording chamber were continuously perfused at a rate of 2 ml/min with recording aCSF maintained at 32-34°C and continuously aerated with 95% O<sub>2</sub>/5% CO<sub>2</sub>. Whole-cell patch clamp recordings were performed in putative principal neurons in the BLA. Glass pipettes with a resistance of 1.6-2.5 MΩ were pulled from borosilicate glass (ID 1.2mm, OD 1.65mm) on a horizontal puller (Sutter P-97) and filled with an intracellular patch solution containing (in mM): 110 CsCl, 30 potassium gluconate, 1.1 EGTA, 10 HEPES, 0.1 CaCl<sub>2</sub>, 4 Mg-ATP, 0.3 Na-GTP, 4 QX-314; pH was adjusted to 7.25 with CsOH and the solution had a final osmolarity of ~ 290 mOsm. DNQX, APV, TTX, Prazosin, Propranolol, WB 4101, A61603, CNO, and NE were delivered at the concentrations indicated via the perfusion bath. Slices were pre-incubated in aCSF containing ω-agatoxin (0.5 μM, 30 min), ω-conotoxin (0.5 μM, 30 min), or YM 254890 (10 μM, 20 min) to block P/Q-type calcium channels, N-type calcium channels and Gα<sub>q/11</sub> activity, respectively (Takasaki et al., 2004; Owen et al., 2013). The same solution as that used for the aCSF was used in the patch pipettes 1.6-2.5 MΩ) for loose-seal extracellular recording of action potentials, which were performed in the I = 0 mode on the patch clamp amplifier. For current clamp recordings, an intracellular patch solution was used containing (in mM): 130 potassium gluconate, 10 HEPES, 10 phosphocreatine Na<sub>2</sub>, 4 Mg-ATP, 0.4 Na-GTP, 5 KCl, 0.6 EGTA; pH was adjusted to 7.25 with KOH and the solution had a final osmolarity of ~ 290 mOsm. Series resistance was normally below 10 MΩ immediately after break through the membrane and was

continuously monitored. Cells were discarded when the series resistance exceeded 20 MΩ. Data were acquired using a Multiclamp 700B amplifier, a Digidata 1440A analog/digital interface, and pClamp 10 software (Molecular Devices). Recordings were filtered at 2 KHz for IPSC recordings and at 10 KHz for action potential recordings and sampled at 50 KHz. Data were analyzed with MiniAnalysis software (SynptoSoft, NJ) and Clampfit 10 (Molecular Devices). Statistical comparisons were conducted with a paired or unpaired Students's *t* test or with a one- or two-way ANOVA followed by a *post hoc* Tukey's test as appropriate ( $p < 0.05$  with a two- tailed analysis was considered significant).

### ***In vivo* electrophysiology**

LFP recordings were performed in awake, freely behaving C57BL/6J and PV-Cre mice, acquired using prefabricated headmounts (Pinnacle Technology, #8201). Frontal cortex EEG and BLA LFP recordings were acquired through a stainless-steel EEG screw and insulated LFP depth electrode implanted over the frontal cortex and in the ipsilateral BLA, respectively. Animals were tethered to the apparatus and EEG and LFP were recorded at 4KHz and amplified 100x. All mice were left to habituate to the recording chamber for at least 30 minutes while tethered before recording. In PV-Cre animals expressing BLA PV hM3D, baseline and treatment conditions (I.P. injection of saline and CNO (5 mg/kg, dissolved in saline)) were recorded for 60 min each. In cannulated C57 mice, baseline and treatment conditions (intra-BLA infusion of saline, NE, WB4101, and WB4101 + NE) were recorded for 30 minutes each.

### **Extracellular field data analysis**

LFP and EEG data were band-pass filtered (1-300 Hz, Chebyshev Type II filter), and spectral analysis was performed in MATLAB using publicly-accessible custom-made scripts developed in

our lab by Pantelis Antonoudiou (<https://github.com/pantelisantonoudiou/MatWAND>) utilizing the fast Fourier transform (Frigo & Johnson, 2005). Briefly, recordings were separated into 5 second bins with 50% overlapping segments. The power spectral density for positive frequencies was obtained by applying a Hann window to eliminate spectral leakage. The mains noise (58-60 Hz band) was removed from each bin and replaced using the PCHIP method. Values 3x larger or smaller than the median were considered outliers and replaced with the nearest bin. Processed spectral data were then imported to Python for resampling into one-minute bins and normalization to baseline. Finally, normalized, resampled data were imported to Graphpad Prism for statistical analysis. Statistical comparisons were conducted with paired Students's *t* tests ( $p < 0.05$  with a two-tailed analysis was considered significant).

### **Cannula fabrication and intra-BLA infusions**

Intra-BLA drug infusion cannulas were fabricated in-house using 27G and 30G syringe needles. Twenty-seven gage syringe needles were cut at each end to produce a 10 mm plastic base and 5 mm barrel. Thirty gage syringe needle barrels were cut to 17 mm from the plastic base (including the 1 mm bit of adhesive at the base of the barrel) to create the internal cannula and inserted through the guide cannula to protrude an extra 2 mm. To produce a clean syringe barrel openings, barrels were initially cut an extra 1-2 mm longer, and shaved back to the desired length using a Dremel rotary tool (Dremel 3000) with a ¼ inch 120-grit sanding band attachment.

Intra-BLA infusions were performed using a 25 µL Hamilton syringe affixed to an automated microinfusion pump (Harvard Apparatus, The Pump 11 Elite Nanomite), and connected to the internal cannula needle via a plastic tubing. Intra-BLA infusions of 300 nL norepinephrine (9.88 mM) and WB4101 (10 µM) were administered at a rate of 0.2 µL/min. After infusion, the needle

was left to sit for an extra minute past the infusion to allow for sufficient diffusion and minimize backflow upon removal from the brain.

## References

- Antonoudiou, P., Colmers, P. L., Walton, N. L., Weiss, G. L., Smith, A. C., Nguyen, D. P., Lewis, M., Quirk, M. C., Melon, L. C., & Maguire, J. L. (2021). Allopregnanolone mediates affective switching through modulation of oscillatory states in the basolateral amygdala. *bioRxiv*, 2021.2003.2008.434156. <https://doi.org/10.1101/2021.03.08.434156>
- Bartos, M., Vida, I., & Jonas, P. (2007). Synaptic mechanisms of synchronized gamma oscillations in inhibitory interneuron networks. *Nature Reviews Neuroscience*, 8(1), 45-56. <https://doi.org/10.1038/nrn2044>
- Bocchio, M., Nabavi, S., & Capogna, M. (2017). Synaptic Plasticity, Engrams, and Network Oscillations in Amygdala Circuits for Storage and Retrieval of Emotional Memories. *Neuron*, 94(4), 731-743. <https://doi.org/10.1016/j.neuron.2017.03.022>
- Buzsáki, G., Anastassiou, C. A., & Koch, C. (2012). The origin of extracellular fields and currents — EEG, ECoG, LFP and spikes. *Nature Reviews Neuroscience*, 13(6), 407-420. <https://doi.org/10.1038/nrn3241>
- Cardin, J. A., Carlén, M., Meletis, K., Knoblich, U., Zhang, F., Deisseroth, K., Tsai, L.-H., & Moore, C. I. (2009). Driving fast-spiking cells induces gamma rhythm and controls sensory responses. *Nature*, 459(7247), 663-667. <https://doi.org/10.1038/nature08002>
- Chu, H.-Y., Ito, W., Li, J., & Morozov, A. (2012). Target-Specific Suppression of GABA Release from Parvalbumin Interneurons in the Basolateral Amygdala by Dopamine. *The Journal of Neuroscience*, 32(42), 14815. <https://doi.org/10.1523/JNEUROSCI.2997-12.2012>
- Chung, L., & Moore, S. D. (2007). Cholecystokinin enhances GABAergic inhibitory transmission in basolateral amygdala. *Neuropeptides*, 41(6), 453-463. <https://doi.org/10.1016/j.npep.2007.08.001>
- Chung, L., & Moore, S. D. (2009). Cholecystokinin Excites Interneurons in Rat Basolateral Amygdala. *Journal of Neurophysiology*, 102(1), 272-284. <https://doi.org/10.1152/jn.90769.2008>
- Courtin, J., Karalis, N., Gonzalez-Campo, C., Wurtz, H., & Herry, C. (2014). Persistence of amygdala gamma oscillations during extinction learning predicts spontaneous fear recovery. *Neurobiology of Learning and Memory*, 113, 82-89. <https://doi.org/10.1016/j.nlm.2013.09.015>
- Davis, P., Zaki, Y., Maguire, J., & Reijmers, L. G. (2017). Cellular and oscillatory substrates of fear extinction learning. *Nature Neuroscience*, 20(11), 1624-1633. <https://doi.org/10.1038/nn.4651>
- Day, H. E. W., Campeau, S., Watson, S. J., & Akil, H. (1997). Distribution of  $\alpha 1a$ -,  $\alpha 1b$ - and  $\alpha 1d$ -adrenergic receptor mRNA in the rat brain and spinal cord. *Journal of Chemical Neuroanatomy*, 13(2), 115-139. [https://doi.org/10.1016/S0891-0618\(97\)00042-2](https://doi.org/10.1016/S0891-0618(97)00042-2)
- Dimidschstein, J., Chen, Q., Tremblay, R., Rogers, S. L., Saldi, G.-A., Guo, L., Xu, Q., Liu, R., Lu, C., Chu, J., Grimley, J. S., Krostag, A.-R., Kaykas, A., Avery, M. C., Rashid, M. S., Baek, M., Jacob, A. L., Smith, G. B., Wilson, D. E., Kosche, G., Kruglikov, I., Rusielewicz, T., Kotak, V. C.,

- Mowery, T. M., Anderson, S. A., Callaway, E. M., Dasen, J. S., Fitzpatrick, D., Fossati, V., Long, M. A., Noggle, S., Reynolds, J. H., Sanes, D. H., Rudy, B., Feng, G., & Fishell, G. (2016). A viral strategy for targeting and manipulating interneurons across vertebrate species. *Nature Neuroscience*, 19(12), 1743-1749. <https://doi.org/10.1038/nn.4430>
- Földy, C., Lee, S. Y., Szabadics, J., Neu, A., & Soltesz, I. (2007). Cell type-specific gating of perisomatic inhibition by cholecystokinin. *Nature Neuroscience*, 10(9), 1128-1130. <https://doi.org/10.1038/nn1952>
- Freund, T. F., & Katona, I. (2007). Perisomatic Inhibition. *Neuron*, 56(1), 33-42. <https://doi.org/https://doi.org/10.1016/j.neuron.2007.09.012>
- Frigo, M., & Johnson, S. G. (2005). The Design and Implementation of FFTW3. *Proceedings of the IEEE*, 93(2), 216-231. <https://doi.org/10.1109/JPROC.2004.840301>
- Garcia-Junco-Clemente, P., Tring, E., Ringach, D. L., & Trachtenberg, J. T. (2019). State-Dependent Subnetworks of Parvalbumin-Expressing Interneurons in Neocortex. *Cell Reports*, 26(9), 2282-2288.e2283. <https://doi.org/https://doi.org/10.1016/j.celrep.2019.02.005>
- Giustino, T. F., & Maren, S. (2018). Noradrenergic Modulation of Fear Conditioning and Extinction [Review]. *Frontiers in Behavioral Neuroscience*, 12(43). <https://doi.org/10.3389/fnbeh.2018.00043>
- Hájos, N., Pálhalmi, J., Mann, E. O., Németh, B., Paulsen, O., & Freund, T. F. (2004). Spike Timing of Distinct Types of GABAergic Interneuron during Hippocampal Gamma Oscillations <em>In Vitro</em>. *The Journal of Neuroscience*, 24(41), 9127-9137. <https://doi.org/10.1523/jneurosci.2113-04.2004>
- Herry, C., Ciocchi, S., Senn, V., Demmou, L., Müller, C., & Lüthi, A. (2008). Switching on and off fear by distinct neuronal circuits. *Nature*, 454(7204), 600-606. <https://doi.org/10.1038/nature07166>
- Jensen, B. C., Swigart, P. M., & Simpson, P. C. (2008). Ten commercial antibodies for alpha-1-adrenergic receptor subtypes are nonspecific. *Naunyn-Schmiedeberg's Archives of Pharmacology*, 379(4), 409. <https://doi.org/10.1007/s00210-008-0368-6>
- Jiang, X., Xing, G., Yang, C., Verma, A., Zhang, L., & Li, H. (2009). Stress Impairs 5-HT<sub>2A</sub> Receptor-Mediated Serotonergic Facilitation of GABA Release in Juvenile Rat Basolateral Amygdala. *Neuropsychopharmacology*, 34(2), 410-423. <https://doi.org/10.1038/npp.2008.71>
- Kanta, V., Pare, D., & Headley, D. B. (2019). Closed-loop control of gamma oscillations in the amygdala demonstrates their role in spatial memory consolidation. *Nature Communications*, 10(1), 3970. <https://doi.org/10.1038/s41467-019-11938-8>
- Karalis, N., Dejean, C., Chaudun, F., Khoder, S., Rozeske, R. R., Wurtz, H., Bagur, S., Benchenane, K., Sirota, A., Courtin, J., & Herry, C. (2016). 4-Hz oscillations synchronize prefrontal-amygdala circuits during fear behavior. *Nature Neuroscience*, 19(4), 605-612. <https://doi.org/10.1038/nn.4251>
- Kondo, S., & Kawaguchi, Y. (2001). Slow synchronized bursts of inhibitory postsynaptic currents (0.1–0.3 Hz) by cholinergic stimulation in the rat frontal cortex in vitro. *Neuroscience*, 107(4), 551-560. [https://doi.org/https://doi.org/10.1016/S0306-4522\(01\)00388-8](https://doi.org/https://doi.org/10.1016/S0306-4522(01)00388-8)
- Krashes, M. J., Koda, S., Ye, C., Rogan, S. C., Adams, A. C., Cusher, D. S., Maratos-Flier, E., Roth, B. L., & Lowell, B. B. (2011). Rapid, reversible activation of AgRP neurons drives feeding behavior in mice. *The Journal of Clinical Investigation*, 121(4), 1424-1428. <https://doi.org/10.1172/JCI46229>
- Lee, S.-H., & Dan, Y. (2012). Neuromodulation of Brain States. *Neuron*, 76(1), 209-222. <https://doi.org/https://doi.org/10.1016/j.neuron.2012.09.012>
- Lee, S. Y., Földy, C., Szabadics, J., & Soltesz, I. (2011). Cell-Type-Specific CCK<sub>2</sub> Receptor Signaling Underlies the Cholecystokinin-Mediated Selective Excitation of Hippocampal



- Parvalbumin-Positive Fast-Spiking Basket Cells. *The Journal of Neuroscience*, 31(30), 10993-11002. <https://doi.org/10.1523/jneurosci.1970-11.2011>
- Levitsky, K. L., Toledo-Aral, J. J., López-Barneo, J., & Villadiego, J. (2013). Direct confocal acquisition of fluorescence from X-gal staining on thick tissue sections. *Scientific Reports*, 3(1), 2937. <https://doi.org/10.1038/srep02937>
- Likhtik, E., Stujenske, J. M., A Topiwala, M., Harris, A. Z., & Gordon, J. A. (2014). Prefrontal entrainment of amygdala activity signals safety in learned fear and innate anxiety. *Nature Neuroscience*, 17(1), 106-113. <https://doi.org/10.1038/nn.3582>
- McCormick, D. A., Nestvogel, D. B., & He, B. J. (2020). Neuromodulation of Brain State and Behavior. *Annual Review of Neuroscience*, 43(1), 391-415. <https://doi.org/10.1146/annurev-neuro-100219-105424>
- McGarry, L. M., & Carter, A. G. (2016). Inhibitory Gating of Basolateral Amygdala Inputs to the Prefrontal Cortex. *The Journal of Neuroscience*, 36(36), 9391-9406. <https://doi.org/10.1523/jneurosci.0874-16.2016>
- McIntyre, C. K., Hatfield, T., & McGaugh, J. L. (2002). Amygdala norepinephrine levels after training predict inhibitory avoidance retention performance in rats. *European Journal of Neuroscience*, 16(7), 1223-1226. <https://doi.org/10.1046/j.1460-9568.2002.02188.x>
- Owen, S. F., Tuncdemir, S. N., Bader, P. L., Tirko, N. N., Fishell, G., & Tsien, R. W. (2013). Oxytocin enhances hippocampal spike transmission by modulating fast-spiking interneurons. *Nature*, 500(7463), 458-462. <https://doi.org/10.1038/nature12330>
- Ozawa, M., Davis, P., Ni, J., Maguire, J., Papouin, T., & Reijmers, L. (2020). Experience-dependent resonance in amygdalo-cortical circuits supports fear memory retrieval following extinction. *Nature Communications*, 11(1), 4358. <https://doi.org/10.1038/s41467-020-18199-w>
- Pierce, K. L., Premont, R. T., & Lefkowitz, R. J. (2002). Seven-transmembrane receptors. *Nature Reviews Molecular Cell Biology*, 3(9), 639-650. <https://doi.org/10.1038/nrm908>
- Polack, P.-O., Friedman, J., & Golshani, P. (2013). Cellular mechanisms of brain state-dependent gain modulation in visual cortex. *Nature Neuroscience*, 16(9), 1331-1339. <https://doi.org/10.1038/nn.3464>
- Rokosh, D. G., & Simpson, P. C. (2002). Knockout of the  $\alpha$ 1A/C-adrenergic receptor subtype: The  $\alpha$ 1A/C is expressed in resistance arteries and is required to maintain arterial blood pressure. *Proceedings of the National Academy of Sciences*, 99(14), 9474-9479. <https://doi.org/10.1073/pnas.132552699>
- Sohal, V. S., Zhang, F., Yizhar, O., & Deisseroth, K. (2009). Parvalbumin neurons and gamma rhythms enhance cortical circuit performance. *Nature*, 459(7247), 698-702. <https://doi.org/10.1038/nature07991>
- Stujenske, Joseph M., Likhtik, E., Topiwala, Mihir A., & Gordon, Joshua A. (2014). Fear and Safety Engage Competing Patterns of Theta-Gamma Coupling in the Basolateral Amygdala. *Neuron*, 83(4), 919-933. <https://doi.org/10.1016/j.neuron.2014.07.026>
- Takasaki, J., Saito, T., Taniguchi, M., Kawasaki, T., Moritani, Y., Hayashi, K., & Kobori, M. (2004). A Novel Gq/11-selective Inhibitor\*. *Journal of Biological Chemistry*, 279(46), 47438-47445. <https://doi.org/10.1074/jbc.M408846200>
- Tamamaki, N., Yanagawa, Y., Tomioka, R., Miyazaki, J.-I., Obata, K., & Kaneko, T. (2003). Green fluorescent protein expression and colocalization with calretinin, parvalbumin, and somatostatin in the GAD67-GFP knock-in mouse. *Journal of Comparative Neurology*, 467(1), 60-79. <https://doi.org/10.1002/cne.10905>



- Vereczki, V. K., Veres, J. M., Müller, K., Nagy, G. A., Rácz, B., Barsy, B., & Hájos, N. (2016). Synaptic Organization of Perisomatic GABAergic Inputs onto the Principal Cells of the Mouse Basolateral Amygdala [Original Research]. *Frontiers in Neuroanatomy*, 10(20). <https://doi.org/10.3389/fnana.2016.00020>
- Veres, J. M., Nagy, G. A., & Hájos, N. (2017). Perisomatic GABAergic synapses of basket cells effectively control principal neuron activity in amygdala networks. *eLife*, 6, e20721. <https://doi.org/10.7554/eLife.20721>
- Wester, J. C., & McBain, C. J. (2014). Behavioral state-dependent modulation of distinct interneuron subtypes and consequences for circuit function. *Current Opinion in Neurobiology*, 29, 118-125. <https://doi.org/10.1016/j.conb.2014.07.007>
- Wilson, R. I., Kunos, G., & Nicoll, R. A. (2001). Presynaptic Specificity of Endocannabinoid Signaling in the Hippocampus. *Neuron*, 31(3), 453-462. [https://doi.org/10.1016/S0896-6273\(01\)00372-5](https://doi.org/10.1016/S0896-6273(01)00372-5)
- Woodruff, A. R., & Sah, P. (2007). Inhibition and Synchronization of Basal Amygdala Principal Neuron Spiking by Parvalbumin-Positive Interneurons. *Journal of Neurophysiology*, 98(5), 2956-2961. <https://doi.org/10.1152/jn.00739.2007>
- Zagha, E., & McCormick, D. A. (2014). Neural control of brain state. *Current Opinion in Neurobiology*, 29, 178-186. <https://doi.org/10.1016/j.conb.2014.09.010>
